# Brittleness in model selection analysis of single neuron firing rates

Chandramouli Chandrasekaran<sup>1,5,†</sup>, Joana Soldado-Magraner<sup>2</sup>, Diogo Peixoto<sup>3,4</sup>, William T. Newsome<sup>3,5,7</sup>, Krishna V. Shenoy<sup>1,3,5-8,\*†</sup>, and Maneesh Sahani<sup>2,\*†</sup>

<sup>1</sup>Department of Electrical Engineering, Stanford University, CA, USA

<sup>2</sup>Gatsby Computational Neuroscience Unit, University College London, UK

<sup>3</sup>Department of Neurobiology, Stanford University, CA, USA

<sup>4</sup>Champalimaud Neuroscience Institute, Lisbon, Portugal

<sup>5</sup>Howard Hughes Medical Institute, Stanford University, CA, USA

<sup>6</sup>Department of Bioengineering, Stanford University, CA, USA

<sup>7</sup>Stanford Neurosciences Institute, Stanford University, CA, USA

<sup>8</sup>Bio-X program, Stanford University, CA, USA

\*denotes equal contribution

2018/09/28

## Abstract

**Models of complex heterogeneous systems like the brain are inescapably incomplete, and thus always falsified with enough data. As neural data grow in volume and complexity, absolute measures of adequacy are being replaced by model selection methods that rank the relative accuracy of competing theories. Selection still depends on incomplete mathematical instantiations, but the implicit expectation is that ranking is robust to their details. Here we highlight a contrary finding of “brittleness,” where data matching one theory conceptually are ranked closer to an instance of another. In particular, selection between recent models of decision making is conceptually misleading when data are simulated with minor distributional mismatch, with mixed secondary signals, or with non-stationary parameters; and decision-related responses in macaque cortex show features suggesting that these effects may impact empirical results. We conclude with recommendations to mitigate such brittleness when using model selection to study neural signals.**

---

† Corresponding Authors:

CC (mouli@stanford.edu)

KVS (shenoy@stanford.edu)

MS (maneesh@gatsby.ucl.ac.uk)

# 1 Introduction

2 Sciences that deal with heterogeneous complex systems—including ecology, economics, finance,  
3 medicine and systems neuroscience—encounter a particular challenge when seeking to validate  
4 theories with data. The classical scientific method, exemplified in fundamental physics, requires  
5 careful quantitative experimental measurements to corroborate precise theoretical predictions within  
6 the margin of observational error (e.g., ATLAS Collaboration, 2012; Schneider, 1992; Renn et al.,  
7 1997). But this is rarely possible in a complex system: no tractable formal theory will fully account  
8 for every complexity, and so measurements are influenced by factors unmodeled and typically  
9 uncontrollable (Focardi et al., 2012). Thus, theories in these fields are most often loosely-defined  
10 models or working hypotheses that may capture the essential trends of empirical phenomena but  
11 inevitably simplify the mathematical forms of empirical relationships, and the shape and source of  
12 empirical variability.

13 At the most basic level, progress in these sciences can be made using experiments which simply  
14 test for the existence of a hypothesized relationship in the data. For example, do primary visual  
15 cortical neurons modulate their firing in response to the orientation of a contrast edge (Hubel and  
16 Wiesel, 1959)? Other studies seek an ordering of effects: is one drug treatment more effective than  
17 another (Kane et al., 1988)? For these types of questions, the classical statistical hypothesis testing  
18 framework (Neyman and Pearson, 1966) can reject null hypotheses of independence or of equivalent  
19 efficacy. However, the approach does not easily extend to testing models: for instance, are the  
20 dynamics of grating-evoked responses consistent with a model where tuning curves are shaped by  
21 strong recurrent interaction (Ringach et al., 1997)? In such cases, the null hypothesis that should be  
22 tested using observational data is not obvious, and direct evaluation of the validity of a particular  
23 model of recurrent interaction inevitably shorn of the fine details of the circuit (e.g., Ben-Yishai et al.,  
24 1995), will always lead to rejection in the face of sufficient data. In some cases, a suitably-designed  
25 intervention may help to address the issue (Lien and Scanziani, 2013; Reinhold et al., 2015) but for  
26 many models, interventions are both conceptually and technologically intractable.

27 The unsuitability of Neyman-Pearson hypothesis testing to validate models of complex systems  
28 has led many to argue for the use of *model selection* in its place (Aho et al., 2014; Anderson and  
29 Burnham, 2002; Raftery, 1995). This family of approaches, which includes cross-validation (Gelman  
30 et al., 2014), a variety of information criteria (Akaike, 1974; Hannan and Quinn, 1979; Akaike, 1998;  
31 Aho et al., 2014; Gelman et al., 2014; Spiegelhalter et al., 2002, 2014), and Bayesian model evidence  
32 or Bayes factors (Gelman et al., 2014; Kass and Raftery, 1995), compares two or more different  
33 models—representative of two or more working hypotheses—to select the model that provides a  
34 better account for a set of observations. Recent years have seen burgeoning interest in applying  
35 model selection in neuroscience, both for the firing patterns of single neurons (Bollimunta et al.,  
36 2012; Latimer et al., 2015b,a, 2016, 2017; Rossant et al., 2011), as well as for functional imaging and  
37 encephalographic signals (Durstewitz et al., 2016; Linderman and Gershman, 2017; Marreiros et al.,  
38 2010a,b; Mars et al., 2012). While broadly supportive, previous authors have highlighted potential  
39 pitfalls and challenges to the proper application of model selection approaches in neuroscience and  
40 other fields (Aho et al., 2014; Anderson and Burnham, 2002; Churchland and Kiani, 2016; Mars  
41 et al., 2012). Much of this concern has focused on the properties and failures of particular selection  
42 criteria, especially in situations where one or the other of the models is assumed to be correct or  
43 closest in a chosen sense to the data (Gelman et al., 2014).

44 In this viewpoint, we highlight a deeper, conceptual, challenge to the application and interpretation  
45 of model selection; one that emerges from a common lack of robustness, which we term “brittleness,”  
46 of selection results in the face of small and apparently tangential deviations between models and  
47 data. We encountered this brittleness as we sought to expand on recent results using model selection  
48 (Latimer et al., 2015b, 2017) and so present our findings in the context of that study, but note that  
49 qualitatively similar issues have arisen in other fields (e.g., ecology; Anderson and Burnham, 2002)  
50 and so the issue is very likely to be pervasive, although it appears to be still underappreciated in  
51 neuroscience and allied fields.

52 The brittleness arises from the need to translate loose theoretical working hypotheses, framed at a  
53 conceptual or intuitive level, into precise mathematical models for testing. Consider, for instance, the  
54 question of whether a neuron signals a decision by an abrupt transition in firing at one point in a  
55 trial (a “step”) or alternatively reflects the gradual accumulation of evidence by a graded change  
56 in rate across the entire trial duration (a “ramp”) (Shadlen and Newsome, 1996; Okamoto et al.,  
57 2007; Bollimunta et al., 2012; Latimer et al., 2015b). These are conceptually distinct theories of  
58 single-neuron dynamics during decision making, but as they stand they are too loosely defined for  
59 model selection. The broad classes they represent must first be reduced to specific mathematical  
60 instances. Latimer and colleagues chose a doubly stochastic “step” model in which a single transition  
61 between fixed spike rates happened at a time and in a direction that depended on sensory evidence,  
62 with spike times distributed according to a Poisson process given the stepped rate. Their doubly  
63 stochastic “ramp” model was based on the drift-diffusion model (DDM) for decision-making: a latent  
64 variable integrated sensory evidence over time until it reached a threshold after which it remained  
65 constant. The sensory evidence was assumed to be drawn from a noisy Gaussian distribution. The  
66 latent variable was mapped to firing through a soft-threshold non-linearity to yield a predicted rate,  
67 with spike times once again drawn from a Poisson process (Latimer et al., 2015b).

68 These are both plausible and simple representative candidate models for steps and ramps, but it  
69 cannot reasonably be expected that real neurons’ firing will be described exactly by either one.  
70 Nonetheless, many model selection criteria seek to identify the model that is closest in some sense  
71 (typically according to a probability divergence, such as the Kullback-Leibler divergence), or following  
72 Box (1976), the most “useful” in predictive terms (Aho et al., 2014; Box, 1976; Burnham and  
73 Anderson, 2003). The presumption is that this sort of criterion will be robust, in that data generated  
74 by any process that falls into one of the broad conceptual hypothesis classes will be closer to the  
75 particular mathematical model used to instantiate that class; or, equivalently, that that mathematical  
76 instantiation will be the more useful. If a neuron’s firing steps, then model selection should prefer  
77 the Poisson change-point step process even if the true step statistics differ from those assumed.  
78 Conversely, if the true change in firing is gradual, like a ramp, then the drift-based model should be  
79 more predictive even if the true ramp follows a different distribution.

80 Our findings show that this robustness does not always hold. Synthetic data that are generated with  
81 small deviations from the drift-diffusion model, such as underdispersion of spike counts relative to  
82 Poisson or incorporation of a systematic stimulus-independent modulation of the rate, become reliably  
83 associated with the “step” model even though no firing-rate step is introduced. More worryingly,  
84 data are similarly misassigned even if they are simulated from the *exact* form of drift-diffusion model  
85 used for selection, but with different settings of the parameters in different subsets. Examining  
86 neuronal data from the lateral intraparietal cortex (Rorie et al., 2010) and dorsal premotor cortex  
87 (Chandrasekaran et al., 2017), we find relationships between firing statistics and model selection

88 results, as well as disparities in trial-by-trial contributions to the selection results, that are consistent  
89 with these potential forms of misassignment. Thus selection results based on these two specific  
90 mathematical models can at best provide only weak evidence to decide between the “step” and  
91 “ramp” conceptual classes that they represent.

92 The conceptual difficulty in the interpretation of model selection applied to complex heterogeneous  
93 systems that our results highlight is very likely to apply in other settings in neuroscience and beyond.  
94 Nonetheless, progress in understanding such systems will ultimately depend on deploying these  
95 methods with care. We offer some suggestions in the Discussion to help in the mitigation of the  
96 attendant challenges.

97 A preliminary version of these results was reported previously (Chandrasekaran et al., Society For  
98 Neuroscience Annual Meeting, 2016).

## 99 Results

100 We evaluated the robustness of model selection using the same selection criterion and the same  
101 specific mathematical models of “step” and “ramp” decision making as adopted by Latimer et al.  
102 (2015b). We considered three ways in which recorded neural data might plausibly differ from both of  
103 the mathematical models being compared, while in each case remaining broadly coherent with the  
104 ramp conceptual framework. Each variation was motivated by either a commonly observed feature of  
105 neural activity, or a theoretical consideration regarding decision-making circuitry. In each case, we  
106 first simulated data from the variant ramp model, evaluating the results of model selection using  
107 Latimer and colleagues’ approach. We then examined decision-related neural data collected in two  
108 different brain regions for signs that the effects we noted in the simulations might also shape the  
109 results of empirical model selection.

## 110 Neural Data

111 We used two data sets, drawn respectively from the lateral intraparietal area (LIP) and the dorsal  
112 aspect of the pre-motor cortex (PMd) in macaque monkeys making binary-outcome decisions about  
113 sensory stimuli.

114 **LIP Data:** The LIP data were recorded by Rorie and collaborators (Rorie et al., 2010) from two  
115 monkeys performing an oculomotor random-dot motion discrimination task (Supp. Fig. 1A). We used  
116 data from 81 LIP neurons recorded across 4 reward conditions, providing us with a pool of 324 (81x4)  
117 pseudo-independent recordings. As suggested in the Latimer et al. (2015b) study, we considered a  
118 recording for analysis only if it had sufficient choice selectivity (defined as having a signal-detection  
119 theory sensitivity ( $d'$ ) of 0.5 or greater). This criterion selected 117 recordings. The firing rates and  
120 other response properties of these recordings are consistent with the many reports of decision-related  
121 activity in LIP (e.g., Shadlen and Newsome, 2001) and other brain areas (Ding and Gold, 2012;  
122 Hanks et al., 2015). LIP neurons had strong firing rates for the preferred (PREF) saccadic choice  
123 trials and modest decreases or flat firing rates for the nonpreferred (NONPREF) saccadic choices.



124 **PMd Data:** The PMd data comprised 806 units recorded from two monkeys while they performed  
125 a color checkerboard reaction time discrimination task, reporting their decision with a self-timed  
126 arm movement (Supp. Figs. 1B-D). We have previously shown that trial-averaged firing rates of  
127 a subpopulation of these PMd units increase gradually during the trial, at a rate that covaries  
128 systematically with choice, sensory evidence, and reaction time (Chandrasekaran et al., 2017).  
129 These are features described in many other studies of decision-related activity in various cortical and  
130 subcortical areas (e.g., Roitman and Shadlen, 2002; Shadlen and Kiani, 2013; Thura and Cisek, 2014)  
131 and consistent with properties expected of a candidate decision variable (Gold and Shadlen, 2007).  
132 In the current study, we examined 429 units that showed the expected hallmarks of decision-related  
133 activity (Shadlen and Kiani, 2013). The average firing rate of the 429 units organized by stimulus  
134 coherence and choice, and reaction time and choice, are shown in Supp. Figs. 2A, B. Other units  
135 either decreased their activity or only responded just before movement initiation and were inconsistent  
136 with a candidate decision variable. We again enforced the criterion that  $d' \geq 0.5$ , selecting a total of  
137 311 units.

## 138 **Model fitting and DIC**

139 We used the computer code developed and generously shared by Latimer and colleagues to perform  
140 a Bayesian fit of both the DDM and the step model to each neuron in both data sets, obtaining  
141 Monte-Carlo samples of parameters that were consistent *a posteriori* with the measured spike counts  
142 (10 ms bins). These “posterior” samples allowed us to evaluate the difference in the deviance  
143 information criterion (DIC) between the two models (Spiegelhalter et al., 2002). DIC is a model  
144 selection metric that combines a goodness of fit term (measured using the deviance or scaled negative  
145 log-likelihood relative to a baseline) with a penalty for model complexity. Higher values of DIC  
146 indicate a poorer description of the data by the model. The difference between the DIC for the DDM  
147 and the step model, the “DIC score,” provides an estimate of the log-ratio of deviances penalised by  
148 a measure of relative model complexity, and can be used to rank the support offered by the data for  
149 the different models. As per Latimer et al. (2015b), negative DIC scores suggest that the data are  
150 better described by a DDM; conversely, positive DIC scores signal data that appear closer to the step  
151 model.

152 Although the precise form of penalty assumed by DIC has been criticised (Spiegelhalter et al., 2014),  
153 it remains widely used. We adopted it here to maintain consistency with the methods of Latimer  
154 et al. (2015b), and because our goal was to address a general point about model selection that is  
155 broadly independent of the criterion used. Further experiments, not shown, revealed comparable  
156 results using alternative model selection criteria.

157 The total deviance and complexity penalty are both obtained by summing contributions from individual  
158 trials, and so the magnitude of DIC tends to increase with trial count. Thus, although we found larger  
159 magnitudes of DIC score in PMd than in either our own LIP data, or than reported by Latimer et al.  
160 (2015b) in theirs, the disparity was very likely to have arisen at least partly from the significantly  
161 larger number of trials we had available from PMd. Furthermore, as both expected value and variance  
162 of DIC scores increase with trial count, and trial length, numerical comparison of scores across studies  
163 is difficult even for similar neuronal populations, as is the choice of a single absolute threshold value  
164 for “significance” (Murtaugh, 2014). We therefore interpreted any DIC score  $> 0$  as evidence in  
165 support of the step model, and scores  $< 0$  as evidence for the DDM.

## 166 **1. Brittleness to violation of parametric assumptions**

167 Model selection is designed to evaluate parametric statistical models, which assign a probability of  
168 occurrence to each possible observation. Thus, the specific models being evaluated must incorporate  
169 assumptions, explicit or implicit, about the forms of the relevant probability distributions. Even  
170 where models are specified in hierarchical form, so that the parameters that most directly govern  
171 the probabilities themselves vary under the control of higher-level parameters, the ranges allowed  
172 and the parametric forms that they govern must still be assumed. This raises the question of how  
173 robust model selection proves to be when data are generated from a process that broadly follows the  
174 form of one of the candidate models, but differs from it—and potentially also from the competitor  
175 model—by an apparently minor parametric choice.

176 We considered this question in the context of the step and ramp models. Both models assumed that  
177 spike counts followed a Poisson distribution around a mean firing rate that itself varied from trial  
178 to trial. Thus, they both predicted that the total variance in the observed spike count in each bin  
179 should be overdispersed relative to Poisson, with a Fano factor greater than 1. Moreover, the DDM  
180 also predicts that the Fano factor should often increase over time, as long as neither the saturating  
181 bound nor the rectifying floor is reached routinely (Supp. Fig. 3).

182 In principle, biophysical processes such as firing refractoriness and adaptation might lead to sub-  
183 Poisson variability in firing. Indeed, underdispersion of spike counts has been reported before in  
184 LIP data (Maimon and Assad, 2009). In our LIP data, we found some neurons with super-Poisson  
185 Fano factors, according with the model assumptions (Fig. 1A). However, many other neurons had  
186 Fano factors less than or around 1 and in some cases these Fano factors also decreased over time  
187 (Figs. 1B-D). In fact, the median Fano factor in the 450 – 700 ms epoch onset after dots onset for  
188 PREF choices was 0.95 (min: 0.56, max: 1.40; sign test  $H_0$ : Fano factor=1,  $p=2.17\times 10^{-4}$ ), and  
189 0.96 for NONPREF choices (min: 0.57, max: 1.42; sign test,  $H_0$ : Fano factor=1,  $p=2.11\times 10^{-5}$ ).  
190 As this underdispersion reflected a parametric departure from both models, it offered a plausible test  
191 of robustness to such variation.

### 192 **Simulated underdispersed DDM firing rates are assigned to the step model**

193 We began by simulating data using the drift-diffusion latent process of the ramp model, but with spikes  
194 generated by a process (gamma-renewal) that is underdispersed relative to Poisson (see Methods  
195 and Supp. Fig. 4A). In these simulations we assumed strong sensory evidence (a non-zero drift rate)  
196 in one group of trials and no sensory evidence (zero drift rate) in the other group, corresponding to  
197 pattern seen in much of our data. While these simulations with underdispersed spike counts depart  
198 from the exact form of DDM used in model selection, they do not introduce any sort of discrete step.  
199 Thus, if model selection were robust we might expect no more than a modest lowering of confidence  
200 in the selection, perhaps reflected in a reduced magnitude of DIC score favoring the DDM. In fact,  
201 we found a reliable trend for model selection to favour the step model as an explanation of these  
202 simulated sub-Poisson DDM spike trains (e.g., Figs. 2A-C and Figs. 2D, E) whereas nearly identical  
203 simulations with DDM dynamics and Poisson spike-generation processes were robustly classified as  
204 consistent with the DDM (Fig. 2F). A similar bias was seen in simulations based on multiple levels  
205 of sensory evidence (4 conditions with 4 drift rates, Supp. Figs. 4B, C). This bias in favour of the  
206 step model for data generated by a process firmly within the ramp conceptual class demonstrates

207 a brittleness of model selection to violations of underlying parametric assumptions, even when the  
208 violation is of an assumption common to both the models being compared.

## 209 **Underdispersion in data is predictive of DIC score for LIP neurons**

210 We wondered if there might be signs of a similar dispersion-induced model selection bias in neuronal  
211 responses recorded from LIP. Unfortunately, spike-count dispersion—as varied in our simulations—  
212 could not be measured directly. Trial-to-trial variance in spike counts conflates two contributions:  
213 one from randomness in integration or stepping across trials and the second from neuronal spiking  
214 variability. Dispersion corresponds to second of these, but it cannot easily be isolated. However, we  
215 reasoned that the Fano factor on NONPREF trials, where firing rates were low and may sometimes  
216 have reflected firing at a baseline rate, might provide a indicative signal for dispersion. Thus, we  
217 asked if this Fano factor predicted DIC scores in the LIP data, either alone or in combination with  
218 additional regressors which might help to isolate dispersion more completely.

219 We first regressed the DIC score for each neuron against its NONPREF Fano factor in an interval  
220 450-700 ms after dots onset, when onset-related transients should have decayed. The result was  
221 consistent with the simulation findings and the interpretation of the NONPREF variance as indicative  
222 of dispersion, with a significant regression weight between NONPREF Fano factor and DIC score for  
223 LIP neurons ( $R^2=0.038$ ,  $p=.034$ ;  $\beta_{Fano\ factor}=-95.08 \pm 44.44$  (standard error; SE);  $t(115)=-2.13$ ,  
224  $p=.034$ , see Eqn. 1).

225 Fano factor will be most accurate as a surrogate for dispersion when other sources of variance are  
226 small. While integration or stepping may play a role in all trials, we reasoned that their influence on  
227 variance would be greatest when they most strongly modulated firing rate, and that this modulation  
228 depth could be estimated by measuring the starting and ending firing rate during the trial. Thus, we  
229 fit an expanded multivariate regression model (see Methods, Eqn. 2) which included the starting firing  
230 rate measured between 300-400 ms (i.e. after the initial 200 ms initial dip in the LIP response) and  
231 the ending firing rate, which was estimated at 600-700 ms after dots onset for each of the PREF and  
232 NONPREF conditions. This combined regression model predicted more variance in the DIC scores  
233 ( $R^2=0.29$ ,  $p=2.17 \times 10^{-7}$ ). In this expanded regression, Fano factor was more strongly related to  
234 the DIC score ( $\beta_{Fano\ factor}=-163.71 \pm 42.15$ ,  $t(111) = -3.88$ ,  $p < .0001$ , partial  $R^2$  for Fano factor=  
235 0.093). The coefficient for the Fano factor remained negative suggesting that underdispersion still  
236 favoured the step model. This was consistent with the results of the simulated underdispersed DDM.

237 The regression coefficients for starting firing rate for PREF and NONPREF choices also predicted  
238 the DIC score (PREF:  $\beta_{Start}=6.5 \pm 1.62$ ,  $t(111)=4.00$ ,  $p < 0.0001$ , NONPREF:  $\beta_{Start}=-5.13 \pm 1.73$ ,  
239  $t(111)=-2.96$ ,  $p < .003$ ). We also observed a modest relationship between ending firing rate for PREF  
240 and NONPREF conditions and DIC (PREF:  $\beta_{end}=-0.27 \pm .80$ ,  $t(111)=-0.33$ ,  $p=0.73$ , NONPREF:  
241  $\beta_{end}=-2.02 \pm 1.73$ ,  $t(111)=-1.98$ ,  $p = .049$ ).

242 Thus, although we cannot be sure of the parametric form that underlies the real data, we found that  
243 LIP responses could be underdispersed, and that DIC scores for neurons with lower Fano factors were  
244 more likely to support the step model even though the step model also predicts overdispersion. Thus,  
245 at least some of these cases may have arisen from a systematic mismatch in dispersion with both  
246 models, rather than any true evidence for a step-like process.

## 247 **2. Brittleness emerging from mixed responses**

248 The behaviour of each element in a complex system is often influenced by many processes running in  
249 parallel. In neuroscience, neurons with “mixed responses” that reflect more than one aspect of a  
250 task are particularly widespread in areas of the brain concerned with cognitive functions (see for e.g.,  
251 Meister et al., 2013; Rigotti et al., 2013; Mante et al., 2013; Raposo et al., 2014). We wondered  
252 how the presence of such signals extraneous to model predictions might affect model selection. In  
253 particular, we considered the case of extraneous signals which very clearly fell outside conceptual  
254 repertoire of the models being tested.

255 The canonical average response profile associated with the decision-making process increases or  
256 decreases monotonically from an initial value towards a bound. Both DDM and step models were  
257 designed to produce such profiles. (Note that although both up and down transitions are possible in  
258 the step model given fixed sensory evidence, the timing of transition does not depend on its sign. So  
259 combining both directions of step still yields a monotonic average.)

260 The PMd data we considered displayed many of the hallmarks of decision making activity (Chan-  
261 drasekaran et al., 2017) and indeed firing rates of some neurons increased monotonically during the  
262 decision-formation period as expected (Fig. 3A, B). However, firing rates of other neurons undulated  
263 during the trial (Fig. 3C, D and many further examples in Supp. Fig. 5). This non-monotonicity  
264 was evident in firing rate averages for single conditions, and so it was not created by averaging over  
265 different condition-specific temporal profiles. Instead, other processes, perhaps related to preparation  
266 of the upcoming movement, appear to be mixed with the decision-making signals.

267 We performed principal components analysis (PCA) on the set of all firing rate profiles (for both  
268 PREF and NONPREF conditions, averaging over strengths of sensory evidence) recorded from the  
269 PMd neurons. A schematic for this analysis is shown in Fig. 4A. The first two principal components  
270 (PCs) captured ~93% of the variance in trial-averaged firing rates during the decision-making task.  
271 That only two PCs capture most of the variance is because differences in evidence, choice, and  
272 reaction time are all collapsed in the overall averages; more dimensions are needed when the PCA  
273 is based on condition-specific means. However, these PCs were designed to reveal mixed signals  
274 that were not necessarily associated with the decision process. Fig. 4B shows the first two principal  
275 components estimated in this way from the PMd firing rates. The first PC profile ( $X_1$ , ~74% of  
276 variance) contributes a monotonic ramp-like change in firing rate in line with the two decision-making  
277 models. However, the second PC ( $X_2$ , ~19%) rises and then falls, peaking approximately 150 ms  
278 before the onset of movement.

### 279 **Simulated non-monotonic firing rates are assigned to the step model**

280 We used the profiles identified by PCA as the basis for a simulation (200 trials per condition, 2  
281 stimulus conditions, again one with a strong drift rate and the other with a zero drift rate) with  
282 latent firing rate time courses showing increases and decreases broadly mimicking the shape of  
283  $X_2$  (Supp. Fig. 6A). We found that model selection applied to these hypothetical neurons with  
284 non-monotonic firing rates tended to favour the step model (Figs. 4C,D). This assignment persisted  
285 even when the latents were initially generated from a DDM and only then modified to incorporate  
286 time-varying firing rate profiles based on  $X_2$  (Supp. Figs. 6B, C). Of the 155 hypothetical neurons

287 simulated with non-monotonic firing rate profiles and robust firing modulation, 122 (Fig. 4E, binomial  
288 test, 78.71%,  $p=3.32 \times 10^{-13}$ ) were better described by the step model even though the simulation  
289 process introduced no explicit steps.

### 290 Non-monotonicity in PMd data predicts DIC score

291 Returning to the data, we asked if DIC score was related to the degree of non-monotonicity in PMd  
292 firing rates. We binned neurons by their loadings on  $X_1$  and  $X_2$  averaged over both PREF and  
293 NONPREF trials, and estimated the percentage difference in assignments to the DDM and step  
294 model for each bin in this two dimensional grid (Fig. 5). When loadings were positive on  $X_1$  and  
295 negative on  $X_2$  (dashed red ellipse in Fig. 5), firing rates of single neurons were both closer to  
296 monotonic and more likely to be selected as consistent with the DDM (Examples 1–3 in Fig. 5).  
297 Conversely, for neurons with loadings positive on  $X_2$  and negative on  $X_1$  (dashed blue ellipse), firing  
298 rates appeared non-monotonic and DIC scores were more consistent with the step model (Examples  
299 4–6 in Fig. 5).

300 Consistent with this qualitative picture, the average loading for a neuron on  $X_2$ , again averaging  
301 over PREF and NONPREF trials, was positively correlated with the DIC score. Thus greater non-  
302 monotonicity, as modeled by projection onto  $X_2$ , is associated with a greater likelihood of being  
303 assigned to the step model (Spearman's  $\rho = 0.16$ ,  $p=.006$ ).

304 We also found a negative correlation with the average loading on the first PC ( $X_1$ ) suggesting  
305 that neurons with stronger overall changes in firing rate are likely to be better described by the  
306 DDM (PREF: Spearman's  $\rho = -0.18$ ,  $p = 0.0015$ ). These correlation analyses were also consistent  
307 with a non-parametric regression that attempted to predict DIC score as a function of the loadings  
308 on  $X_1$  and  $X_2$  (Birkes and Dodge, 2011,  $F(308) = 19.85$ ,  $p < .00001$ ,  $\beta_{X_1} = -599.08 \pm 133.13$ ,  
309  $t(309) = -4.99$ ,  $p < .0001$ ;  $\beta_{X_2} = 680.87 \pm 124.82$ ,  $t(309) = 5.46$ ,  $p < .0001$ ).

310 Recall that neither the DDM nor the step model predicts non-monotonic firing rates profiles, and so  
311 this additional signal mixed in the PMd data should not overtly favour either model during selection.  
312 Nonetheless, we find that it has a clear impact on outcomes.

313 Together, the analyses suggest that non-monotonicity in firing rate profiles can impact the results of  
314 model selection. Neurons with more non-monotonicity in their firing rates were more likely to be  
315 identified by model selection as more consistent with the step model.

### 316 3. Brittleness to parameter non-stationarity or adaptation

317 Model selection, like other statistical analyses applied to high-dimensional complex systems, requires  
318 a great deal of data to yield confident results. This requirement increases the chances that a system  
319 will adapt or experience fluctuations over the period spanned by data collection, or that trials collected  
320 under different experimental conditions will need to be grouped together. In this case, even when a  
321 system is well described by a single parametric *form* of model, the specific parameter *values* that  
322 best characterise it may vary with time or experimental factors. In our final study we asked whether  
323 model selection would prove to be robust to such variation when the models tested formally assumed



324 a single setting of the parameters to explain all data, albeit one that is treated as unknown and  
325 modelled with uncertainty in a Bayesian analysis.

326 Parameter variation might arise naturally within a neural implementation of a drift-diffusion process  
327 where evidence for opposite decisions is accumulated in two competing neural populations (e.g.,  
328 Usher and McClelland, 2001). In such circuits, evidence supporting a NONPREF decision arrives  
329 indirectly through inhibition from the competitor neural pool. If the gain of such inhibition differs  
330 from that of the direct positive evidence then both the drift rates and the diffusion variance for  
331 NONPREF trials would be different from those in the PREF condition. Indeed, it may even be that  
332 ongoing inhibition is weak or non-existent, so that the two populations are engaged in a ‘race’ to  
333 separate thresholds, with a strong inhibitory signal unleashed by the population that wins. In this  
334 case, individual neurons might appear to “step” down for NONPREF decisions, but still “ramp” up  
335 in PREF conditions. Differences in dynamics between the PREF and NONPREF conditions have  
336 been suggested previously for both PMd (See Fig. 6 of Thura and Cisek, 2014) and LIP (Fig. 7 of  
337 Roitman and Shadlen, 2002). We considered these two possibilities in two simulations (Fig. 6 and  
338 Fig. 7).

### 339 **Difference in diffusion variance for different conditions**

340 In the first case, we simulated responses in which one set of trials had a high drift rate and diffusion  
341 variance on the same order of magnitude as that estimated for the LIP data, while the other had  
342 zero drift and diffusion variance was either one or two orders of magnitude smaller than the first.  
343 This setup was broadly consistent with the case of inhibition arriving with low gain from a competing  
344 population, although in our simulations the gain depended on the overall signal rather than the  
345 instantaneous input. Two example simulations where the diffusion variance for one set of trials was  
346 one order of magnitude smaller than the variance of another set of trials are shown in Figs. 6A-C.  
347 These hypothetical neurons with latent dynamics from the DDM but different values of diffusion  
348 noise were often identified as being more consistent with the “step” model, even though no steps  
349 were present in the generative model (Fig. 6D, 110/122 simulated neurons with were identified as  
350 consistent with the step model,  $p=2.73 \times 10^{-21}$ , binomial test).

### 351 **Drift-diffusion for PREF choices, and steps for NONPREF choices**

352 The second simulation was analogous to the ‘race’ model of decision formation described above,  
353 where the neurons would appear to ramp for PREF choice trials but step down on NONPREF choice  
354 trials. Figs. 7A, B and Fig. 7C show examples of two hypothetical neurons simulated using this hybrid  
355 model. As the numbers of PREF and NONPREF trials in the simulations are equal, robust model  
356 selection would arguably generate scores distributed near to and around 0, with roughly half of the  
357 hypothetical neurons being assigned to each class. Alternatively, given the robust modulation modeled  
358 for the PREF choices and relatively weaker modulation (and thus less “signal”) for NONPREF choices,  
359 it might also have been reasonable for DIC scores to modestly favour the DDM. In fact, model  
360 selection assigned *all* of the simulated hypothetical neurons to the step model (Fig. 7D, median DIC  
361 score=197.71), even when the DDM parameters for drift and diffusion were substantial in the PREF  
362 direction.



363 PREF and NONPREF trials combine to affect DIC scores in two ways. First, the parameters of the  
364 competing models are fit to all trials at once, and so where the two groups are generated by different  
365 processes the resulting posterior distributions must reflect a compromise between conflicting sources  
366 of evidence. Second, the final DIC score is formed by summing contributions from each trial to the  
367 deviance and its posterior average (see Methods).

368 If both PREF and NONPREF trials are generated from a single model with a single set of parameters,  
369 then we expect the net contributions to DIC from both groups of trials to be consistent to within  
370 noise-driven variability. We wondered if the converse would be consistently true. That is, in these  
371 neurons simulated from this mixture of the DDM and the step model, would the DIC contributions  
372 made by the corresponding groups of trials correctly identify that the PREF trials come from the  
373 DDM and NONPREF trials come from the step model (even though the parameters would still be  
374 fit to all the trials together). This was indeed the case for a subset (32/198) of the hybrid model  
375 simulations, with the sum of PREF trial contributions pointing to the DDM model, but NONPREF  
376 contributions supporting the step model. However, for the majority of the hypothetical neurons  
377 (166/198), the DIC score contributions from both the PREF and NONPREF directions favoured the  
378 step model. Thus, although systematic inconsistency in the direction of the contribution made by  
379 two subsets of the data (here PREF and NONPREF trials) may be reasonably taken to challenge the  
380 DIC results, the converse does not hold. Consistency in the directions of net contributions from two  
381 groups of trials does not imply a robust conclusion.

## 382 Results of model selection on PMd and LIP data differ for PREF and NONPREF trials

383 We wondered whether the neural data might also show signs of inconsistency between PREF and  
384 NONPREF trials. We first examined contributions to the total DIC score made by each group  
385 (Fig. 7E, F). If each neuron was equally well fit by ramp or by step model in both groups of trials  
386 then we might have expected these contributions to have been well correlated. Instead, we found a  
387 broad diversity of patterns, with 49/117 (41.88%, Fig. 7E) neurons in LIP and 125/311 (40.16%,  
388 Fig. 7F) units in PMd exhibiting inconsistency in the contributions from PREF and NONPREF trials.  
389 In general, PREF trial contributions pointed to the DDM more often than those of NONPREF trials  
390 for both LIP (Chi-Squared test, PREF: 55/117 support DDM, NONPREF: 24/117 support DDM,  
391  $\chi^2(1) = 19.06, p < .0001$ , Fig. 7E) and PMd (Chi-squared test, PREF: 173/311 support DDM,  
392 NONPREF: 104/311 support DDM,  $\chi^2(1) = 30.92, p < .0001$ , Fig. 7F).

## 393 Discussion

394 We asked whether model selection could robustly distinguish between two conceptual hypothesis  
395 classes given the inevitable heterogeneity of data from complex systems. In our simulations—and  
396 those of Latimer et al. (2015b)—when data were generated from an exact instance of one or the other  
397 of the two mathematical models being compared, the DIC criterion correctly favoured the generating  
398 model. In this way, then, model selection worked as intended. However, once the parameters of the  
399 generating process departed from the formally specified DDM-based model chosen for analysis, model  
400 selection proved brittle and mis-assignments became common. This happened even for intuitively  
401 minor departures that preserved the gradual changes in single-trial firing rate that are characteristic

402 of the “ramp” class that the DDM was meant to represent, without introducing the abrupt changes  
403 key to the competing “step” model. The neural data from decision-making experiments that we  
404 examined shared diagnostic features with the variant models we simulated, raising concerns about  
405 the interpretability of model selection results in these data.

406 Information criteria for model selection that approximate a probabilistic distance between models and  
407 data are intended to be robust to small variations in the generative process. When neither model  
408 fits exactly, the information-theoretically closer of the two models to the data should also be the  
409 more conceptually consistent with them. Our results belie this common assumption, demonstrating  
410 empirically that model selection applied to complex data can be brittle. Although we only discussed  
411 results with DIC here so as to remain comparable to earlier work, we found much the same to be true  
412 of the “widely applicable” information criterion (Watanabe, 2010). Rather than depending on the  
413 precise criterion chosen, it seems likely that brittleness arises from a fundamental mismatch between  
414 probabilistic or information-theoretic proximity and conceptual consistency.

415 The situation can be summarised using a fruit analogy (Fig. 8). Suppose that we seek to classify  
416 a sample fruit into either the pome or the citrus families (model classes) based on its appearance  
417 alone. Both families are difficult to describe in their respective entirety: the potential range of  
418 hybrid or sport pome and citrus fruit is so extensive and complex that no simple model of their  
419 appearance will capture every potential variation. Instead, we are forced to choose two representative  
420 instances against which to compare the new fruit. Call them the apple and the orange (Fig. 8A).  
421 When presented with a new fruit we ask whether it appears closer to our model of an apple than an  
422 orange, and if so classify it as “pome”. This is the operational essence of model selection as used in  
423 the complex sciences. For instance, in the case we considered here, the pomes are steps, the apple  
424 the Poisson change-point model (with all its constraints), while the citrus are ramps and the orange  
425 the drift-diffusion-based model.

426 One challenge posed by this model selection approach is obvious. Our procedure identifies every  
427 fruit as “pome” or “citrus”. If applied to, say, a banana, such a classification is meaningless; but the  
428 model selection procedure has no automatic way of rejecting the comparison (Fig. 8B).

429 More pernicious, perhaps, is the case of a sanguinello or blood orange. Intuitively and botanically  
430 this is a citrus fruit. However, if the model of “orange” appearance is specified to have a very narrow  
431 range of possible skin colours, while that of “apple” tolerates many hues (green, yellow, red, ...),  
432 then it is possible that when forced to select between these two specific models the “apple” is found  
433 to be closer (Fig. 8C). Arguably, this is analogous to what happened in many of our case studies  
434 (Fig. 8D). Data generated from versions of the DDM that retained the gradual firing rate change  
435 over the trial that is central to the informal definition of “ramp” nonetheless fell outside the narrow  
436 definition of the model instance used for testing, and so were classified as a “step”.

## 437 **Consequences for interpreting decision-making processes**

438 We were led to consider the brittleness of model selection while attempting to extend the step or  
439 ramp characterisation of decision-related activity discussed by Latimer et al. (2015b). However, as  
440 our results demonstrate, model selection in this application proves to be brittle in many respects.  
441 Although we believe the underlying question to be well-founded and important, the particular model  
442 instantiations for step and ramp chosen in that study fail to represent the intended conceptual

443 model classes fully. In particular, apparently minor deviations from the ramp DDM model lead to  
444 mis-assignments of model selection, and evidence for such deviations is evident in neural data. Based  
445 on these concerns, we cannot rule out the possibility that, despite the apparent model-selection  
446 evidence from Latimer et al. (2015b), all neurons in LIP (and PMd) with decision-related activity  
447 reflect some form of ramp-like drift-diffusion process.

## 448 **Recommendations to mitigate the brittleness of model selection**

449 Despite the challenges to its application and interpretation, we believe that model selection should  
450 still play an important role in systems neuroscience (Churchland and Kiani, 2016; Durstewitz et al.,  
451 2016; Linderman and Gershman, 2017). To paraphrase Box's position: all models of a complex  
452 system are inescapably wrong, and so hypothesis testing will always lead to rejection in the face of  
453 enough data. Nonetheless, scientific progress depends on identifying models that are both reasonable  
454 and useful.

455 An increasingly sophisticated arsenal of data-gathering technologies (Jun et al., 2017; Maynard et al.,  
456 1997), along with novel capabilities to intervene with ever finer precision in the central nervous  
457 system (Lee et al., 2015; Packer et al., 2014), make it possible to test a widening array of models  
458 by evaluating qualitative, rather than quantitative, predictions that are able to distinguish between  
459 entire classes of conceptual model. Where they are possible, such experiments may obviate the need  
460 for formal model selection. But for many models, including those represented by the “step” and  
461 “ramp” considered here, such qualitative approaches remain technically intractable.

462 How might a future model-selection study then mitigate these challenges? Based on the insights  
463 from the case studies here, we offer three recommendations that could help make conclusions based  
464 on model selection applied to neural responses more robust.

465 First, an initial set of qualitative methods should be used to rule out any potential instances in  
466 the data that are broadly inconsistent with all of the working hypotheses being considered—that  
467 is, “bananas” in our fruit analogy. This may require a close look both at the overall behaviour, and  
468 at the variations within the data set. Where the data are single neuron recordings, for example,  
469 it may be that a simple summary statistic such as the grand-mean firing rate over all trials and  
470 neurons appears broadly consistent with the models under consideration, but that the contribution  
471 of individual neurons to this mean are not. Although apparent departures from the hypotheses in  
472 any one neuron might be put down to noise, systematic deviations that appear in some degree in  
473 many neurons suggest that the model space needs enlargement. Such systematic deviations may be  
474 revealed by methods such as PCA that examine the pattern of firing rate profiles of neurons in the  
475 population as a whole. This was the case in the PMd data set considered here. The grand-mean  
476 firing rate profile across neurons appeared to increase gradually throughout the trial (Supp. Fig. 2)  
477 in a manner plausibly consistent with either step model or DDM. However, PCA revealed that this  
478 grand mean concealed a significant component of variation in individual neuron firing rate patterns  
479 that did not fit either hypothesis; and we found that the strength of this component in an individual  
480 neuron firing rate was predictive of the model selection outcome.

481 A second proposal is to carry out confirmatory qualitative analyses after selection, to ask whether the  
482 quantitative assignments appear plausible—and so to test for the possibility that a blood orange has  
483 been classed as an apple. This might involve reassessing properties of the data themselves in light

484 of the selected model fit, although we did not take such an approach here. Instead, we observed a  
485 qualitative feature in the model selection results themselves which cast doubt on robustness. If model  
486 selection were robust, then—for data that are collected in trials, as ours were—it would be reasonable  
487 to expect that each type of trial should influence the selection result in the same direction, even if not  
488 with the same confidence. In fact, for many of our PMd and LIP neurons PREF and NONPREF trials  
489 systematically disagreed in their contributions to selection, with the overall assignment depending on  
490 which contribution was the stronger. In principle, this finding could mean that the different groups of  
491 trials were, in fact, better described by different classes of model. However, we found that a similar  
492 situation arose in simulations when all the trials were generated by a single class of model but with  
493 different parameters. Thus, the observed heterogeneity suggests again that the model space chosen  
494 is too restrictive and so the results of selection suspect.

495 Both recommendations above are diagnostic of brittleness, but do not in themselves offer a clear  
496 solution. In fact, however, both point to the conclusion. Despite the appeal inherent in selecting a  
497 single, elegant mathematical model to represent each working hypothesis under consideration, model  
498 selection results will align more closely to the intuitive hypothesis classes if each is represented by  
499 a composite model which attempts as far as possible to tile the range of the hypothesis space —  
500 representing “citrus” by oranges, lemons, limes, grapefruit and more exotic varieties; and “pome” by  
501 apples, pears, quince, loquat and others (Burnham et al., 2011). In the current example, for the “step”  
502 class one might consider models that allow more than one transition between the parametrized firings,  
503 and trial-to-trial fluctuations in gain (Goris et al., 2014); while “ramp” models, even if restricted to  
504 the DDM, may incorporate variable start times for different trials (Kiani et al., 2014), a non-zero  
505 lower bounding rate (Zylberberg and Shadlen, 2016), and elements such as urgency (Ditterich, 2006)  
506 or bound collapse (Hawkins et al., 2015b,a). Both models may be elaborated with different spiking  
507 statistics (Pillow, 2009).

508 None of these proposals provides a fully automated fix to the issues we have raised. However many  
509 qualitative measures have been evaluated, it is always possible that another measure will reveal the  
510 assigned fruit to be an imposter. Any enumeration of formal models within a hypothesis class — say  
511 of all the varieties of tangerine — will always be open to the discovery or invention of another. Thus,  
512 formal statistical model selection cannot be more than one tool of many, that must be combined to  
513 advance our understanding of complex systems such as the brain.

## 514 **Summary**

515 Fields such as systems neuroscience, which study heterogeneous and complex natural systems, face  
516 a particular challenge in the evaluation of theoretical models. All such models will inescapably be  
517 rejected by hypothesis testing based on enough data. So, scientific progress depends on identifying  
518 models that are reasonable, and more importantly useful, rather than “correct”. In neuroscience,  
519 improvements in data gathering and interventional technologies increasingly make it possible to  
520 test qualitative predictions of some models. But such methods still have limits, and there remains  
521 a need for formal model selection where such tests are intractable. While we broadly support the  
522 use of such methods, we have identified a key challenge which may lead to misguided conclusions  
523 about the neural dynamics underlying behavior. To guard against such challenges, model selection  
524 should employ a plurality of model instances within each broad class to be considered, and should be  
525 combined with qualitative measures of model agreement to provide a more robust path to scientific  
526 progress.

## 527 STAR Methods

528 The task, training and electrophysiological methods used to collect the data used here have been  
529 described previously (LIP: Rorie et al. 2010; PMd: Chandrasekaran et al. 2017) and are reviewed  
530 briefly below. The methods for fitting the models are elegantly and comprehensively described in the  
531 recent report (Latimer et al., 2015b) and book chapter (Latimer et al., 2015a) that developed the  
532 model selection framework. Again, we review these only briefly.

### 533 Oculomotor visual discrimination task and recordings from LIP:

534 **Task:** Two monkeys (Ar and Te) performed a variant of a *fixed duration* random dot discrimination  
535 task where both stimulus difficulty—set by the coherence level of the random dots—and reward  
536 contingencies were manipulated (Supp. Fig. 1A, Rorie et al., 2010). The monkeys were trained to  
537 detect the net direction of motion of a noisy moving random-dot stimulus and report it by making  
538 a saccadic eye movement to one of two targets positioned in line with the axis of motion being  
539 discriminated. The dots stimulus was displayed for 500 ms. Following this, monkeys were required to  
540 maintain fixation for a variable delay (300-550 ms), and were then cued to initiate the eye-movement  
541 report. A correct response was rewarded with a drop of juice; the size of the reward depended on the  
542 value assigned to that target.

543 **Recordings:** While monkeys performed this task, single neuron activity was recorded from LIP using  
544 single, sharp dura-piercing electrodes. The original report included 81 LIP neurons (51 from Monkey  
545 Ar, 30 from Monkey Te) and neurons were selected in the original study using a variant of the  
546 delayed saccade task. Each neuron was tested in 4 different reward conditions. We separated these  
547 conditions, giving a pool of 324 pseudo-independent recordings (81 neurons x 4 reward contingencies)  
548 with which to examine the model selection technique.

549 **Model selection analysis:** For analysis of these LIP firing rates (FRs) we took all data in an  
550 interval from 200 ms after dots onset until 200 ms after the dots offset; the lag was designed to  
551 avoid the initial transient often seen in LIP responses and to approximate the latency with which  
552 visual information arrives in LIP (Roitman and Shadlen, 2002). As in Latimer et al. (2015b), we only  
553 selected firing rates from recordings with adequate choice selectivity ( $d' > 0.5$ , LL: 36, HH: 26, LH:  
554 33,HL: 22). This selection criterion left a total of 117 pseudo-independent recordings. Following  
555 Latimer et al. (2015b), we binned trials in the LIP data according to their signed motion coherence  
556 into six different groups by level (3 in each direction), with 0% coherence trials placed in a separate  
557 group.

### 558 Somatomotor reaction time visual discrimination task and recordings from 559 PMd:

560 **Task:** Two trained monkeys (Ti and Oi) performed a visual reaction time discrimination task  
561 (Chandrasekaran et al., 2017). The monkeys were trained to discriminate the dominant color in  
562 a central static checkerboard composed of red and green squares and report their decision with  
563 an arm movement (Supp. Figs. 1B-D). If the monkey correctly reached to and touched the target



564 that matched the dominant color in the checkerboard, they were rewarded with a drop of juice.  
565 The reaction time task allowed monkeys to initiate their action as soon as they felt they had  
566 sufficient evidence to make a decision. On a trial-by-trial basis, we varied the color coherence of the  
567 checkerboard, defined as  $100 \times (R - G)/(R + G)$ . (Supp. Fig. 1D), where R is the number of red  
568 squares and G the number of green squares. The color coherence value for each trial was chosen  
569 uniformly at random from 14 different values arranged symmetrically from 90% red to 90% green.  
570 Reach targets were located to each side of the checkerboard. In many sessions their colors were also  
571 chosen randomly on each trial; in a few other sessions the target configuration was fixed over a block  
572 of contiguous trials.

573 **Recordings:** In our original study, we reported the activity of 996 units recorded from Ti (n=546),  
574 and Oi (n=450) while they performed the task (Chandrasekaran et al., 2017). PMd units demonstrate  
575 temporal complexity in their firing rate profiles. We analyzed an 806 unit subsample and applied the  
576 visuomotor index of Chandrasekaran et al. (2017) that measures the degree of sustained activity to  
577 separate this population into the broad categories of increased (429/806), perimovement (118/806)  
578 and decreased (259/806) units. **Increased units** exhibited ramp-like increases in average firing rate,  
579 time-locked to the onset of the visual stimulus, with slopes that varied with stimulus coherence.  
580 These are the classic candidates for neurons that might carry an integrated decision variable for the  
581 discrimination task (Supp. Figs. 2A,B). We therefore focused for this study on these increased units,  
582 again filtering for significant choice selectivity ( $d' > 0.5$ ), arriving at 311 PMd units for analysis.

583 **Model selection analysis:** For analysis of single-trial firing rate dynamics, we used spike trains  
584 beginning 100ms after the checkerboard onset and extending until the initiation of movement. The  
585 100 ms assumed latency matched that found in population analysis in our previous study. Analysed  
586 spike trains were therefore approximately 200 to 900 ms long, and the probability density of the time  
587 analysed for each trial roughly matched a gamma distribution. To simplify and speed up the model  
588 selection analysis, we first created a signed directional evidence measure signal which combined  
589 the checkerboard signed coherence and the target configuration. We then grouped the 14 signed  
590 directional evidence values into six different levels.  $\{-90, -60, -40\}$ ,  $\{-30, -20\}$ ,  $\{-10, -4\}$ ,  $\{4, 10\}$ ,  
591  $\{20, 30\}$ ,  $\{40, 60, 90\}$ .

## 592 Statistical Analysis

### 593 Regression analysis for LIP neurons

594 We pursued two regression analyses to examine the relationship between under dispersion and DIC  
595 scores for the LIP neurons.

In the first, we tested the relationship between DIC and Fano factor for the NONPREF choices ( $FF_{NONPREF}$ ).

$$DIC \sim \beta_0 + \beta_1 FF_{NONPREF} \quad (1)$$

596 In a second regression analysis, we included both the starting and the ending firing rates for the



597 PREF and NONPREF choices.

$$DIC \sim \beta_0 + \beta_1 FF_{NONPREF} \quad (2)$$

$$+ \beta_2 Start_{PREF} + \beta_3 Start_{NONPREF} \quad (3)$$

$$+ \beta_4 End_{PREF} + \beta_5 End_{NONPREF} \quad (4)$$

598 We used standard regression methods to fit these models and report the model fit, the coefficients, t-  
599 statistics, and p-values in the main text. We also report the partial  $R^2$  for the regression between  
600 DIC and NONPREF Fano factor, after accounting for the starting and ending firing rates. Using  
601 other intervals (e.g., the entirety of the dots epoch) for the Fano factor did not materially alter the  
602 results nor did using the PREF direction Fano factor in place of the NONPREF Fano factor.

### 603 **Principal component analysis of PMd neurons**

604 To perform principal component analyses (PCA) of the firing rates of PMd neurons, we aligned the  
605 data to movement onset and averaged to obtain the mean PREF and NONPREF response profile  
606 for each one. We then created a large matrix of firing rates of size  $2N \times T$ , where  $N$  refers to the  
607 number of units analyzed and  $T$  the time period. We chose the 500 ms before movement onset as  
608 the time period for the PCA analysis.

609 We first subtracted the mean across neurons from this matrix and computed the principal components  
610 via eigenvalue decomposition of the covariance matrix of this centered firing rate matrix. We then  
611 used the loadings on the principal components for our analyses.

### 612 **Correlation and regression analyses for PMd neurons**

613 We used two methods to investigate the relationship between the loading on principal components  
614 and DIC score. For the PMd data, we obtained significant numbers of very large outlier DIC scores (  
615  $> \pm 1000$ ) either in support of the DDM or the step model. These outliers can impact the values of  
616 Pearson correlation and linear regression coefficients. We therefore used Spearman rank correlations  
617 and non-parametric regression to investigate relationship between DIC and the loadings (Birkes and  
618 Dodge, 2011). For correlation analyses, we used Spearman's correlation between the average loading  
619 on a principal component for the PREF and NONPREF trials and the DIC score for a neuron. We  
620 also used a non-parametric regression where we predicted DIC score using the average loading for  
621 PREF and NONPREF firing rates on  $X_1$  and  $X_2$  and report the F statistic for the regression as well  
622 as t statistics for the predictors (Birkes and Dodge, 2011).

### 623 **Model specification for analysis of binned single neuron responses**

624 We briefly review the formulation and the parameters for the step and DDM models introduced  
625 by Latimer et al. (2015b,a). The model selection method evaluates whether single-trial responses  
626 of decision-related neurons are better explained by a step model or a DDM. Both models assume  
627 that an observed spike train is a Poisson process with a rate governed by a noisy, unobserved latent

628 process. Therefore, both the DDM and the step model are “doubly stochastic”. In the case of the  
 629 DDM, the latents follow a noisy diffusive process whereas in the step model the stochasticity arises  
 630 from randomness in step times across trials.

**DDM:** The drift-diffusion model of single-trial firing rate dynamics is parameterized as follows. The time-varying firing rate  $r_{j,1} \dots r_{j,T_j}$  for trial  $j$  of length  $T_j$  time steps (each of size  $\Delta t$ ) is determined by a latent trajectory  $(x_{j,1} \dots x_{j,T_j})$ , which is distributed according to a discrete-time drift-diffusion process. The latent process starts at an initial state  $x_0$ . At each time step, it evolves with a drift rate of  $\beta_{c(j)}$  where  $c(j)$  indexes the coherence on trial  $j$ , and diffusion noise of variance  $\omega^2$ . The firing rate  $r_{j,t}$  follows this drift-diffusion process until it reaches an absorbing upper bound, given by  $\gamma$ . There is no absorbing lower bound. The model for trial  $j$  can be written as follows (c.f. Latimer et al., 2015b):

$$\begin{aligned} x_{j,1} &= x_0 + \varepsilon_{j,0} \\ x_{j,t+1} &= x_{j,t} + \beta_{c(j)} + \varepsilon_{j,t} \quad \text{for } t = 1 \dots T_j \end{aligned} \quad (5)$$

$$\varepsilon_{j,t} \sim \mathcal{N}(0, \omega^2) \quad \text{for } t = 0 \dots T_j$$

$$\tau_j = \begin{cases} \min\{t : x_{j,t} \geq 1\} & \text{if any } x_{j,t} \geq 1 \\ \infty & \text{otherwise} \end{cases} \quad (6)$$

$$r_{j,t} = \begin{cases} f(\gamma x_t) & \text{for } t < \tau_j \\ f(\gamma) & \text{for } t \geq \tau_j \end{cases} \quad (7)$$

$$y_{j,t} \sim \text{Poisson}(r_{j,t} \Delta t) \quad (8)$$

$\tau_j$  is the bound-hitting time (the first time bin at which  $x_{j,t} \geq 1$ ). The latent state is converted into a firing rate using the soft-rectification function:

$$f(\gamma x_t) = \log(1 + \exp(\gamma x_t)) \quad (9)$$

631 In this formulation, the effective absorbing bound for the latent variable  $x$  is 1, and the latent is scaled  
 632 by  $\gamma$  to obtain the neuron’s spike rate. This spike rate is then used to generate spike counts from a  
 633 Poisson distribution. (Note that latent trajectories in Fig. 2, Fig. 6 and Fig. 7 are shown with the  
 634 bound applied directly to  $x$ .) The parameters for the diffusion model are :  $\Theta = \{x_0, \omega^2, \gamma, \beta_1 \dots \beta_C\}$ .  
 635 The condition-specific slope parameters  $\beta_1 \dots \beta_C$  allow the rate of accumulation to vary with the  
 636 strength of the sensory evidence—in our task, given by the coherence level of the random dots or the  
 637 difference in red vs. green dots in the checkerboard. The parameters are governed by the following  
 638 prior distributions, with fixed hyperparameters:

$$\begin{aligned} x_0 &\sim \mathcal{N}(\mu_0, \sigma_0^2) \\ \beta &\sim \mathcal{N}(\mu_\beta, \sigma_\beta^2) \\ \omega^2 &\sim \text{Inv-Gamma}(\alpha_\omega, \beta_\omega) \\ \gamma &\sim \text{Gamma}(\alpha_\gamma, \beta_\gamma) \end{aligned}$$

639 **Step model:** The step model is constructed around three possible firing states: an initial state 0  
 640 with constant firing rate  $\alpha_0$  and two other states 1 and 2, with rates  $\alpha_1$  and  $\alpha_2$  respectively, that

641 are associated with the possible decisions in a 2AFC task. Transitions between these states occur  
642 instantaneously, and at most one state transition is allowed on each trial (i.e., the firing rate will  
643 either remain constant at the initial rate, or change from the initial state to a single other value at  
644 some point). The transition on the  $j^{\text{th}}$  trial happens at a time  $z_j$  drawn from a negative binomial  
645 distribution, and to the state given by  $d_j \in \{1, 2\}$ , with probabilities  $(\phi_{c(j)}, 1 - \phi_{c(j)})$  that depend  
646 on the strength of sensory evidence. If  $z_j$  is greater than the trial length, then no step occurs during  
647 the trial.

$$\begin{aligned} z_j &\sim \text{NegativeBinomial}(p_{c(j)}, r) \\ d_j &\sim \text{Categorical}(\phi_{c(j)}, 1 - \phi_{c(j)}) \\ y_{j,t} &\sim \begin{cases} \text{Poisson}(\alpha_0 \Delta t) & \text{if } t \leq z_j \\ \text{Poisson}(\alpha_{d_j} \Delta t) & \text{if } t > z_j \end{cases} \end{aligned}$$

648 **Implementation:** We used the MATLAB (Mathworks) and CUDA (NVIDIA) code published by  
649 Latimer et al. (2015b), with a minor modification to the number of GPU compute threads to  
650 accelerate analysis of our PMd, LIP, and hypothetical neuron datasets. We confirmed that our  
651 modification did not introduce any inadvertent errors by verifying that our results were consistent  
652 with those produced by the original code for two sample neurons. Analyses ran on custom-built  
653 computers containing multiple GPUs (9 GPUs in total, 3 in each computer using a mixture of GeForce  
654 GTX 980, 980 Ti, Titan Black and Titan Z cards).

## 655 Simulations

656 Simulations of hypothetical neurons allowed us to study the robustness of model selection, by  
657 providing data for which the true generative model was known.

658 We used the implementation of the DDM “ramp” model (Equations 5–9) provided by Latimer et al.  
659 (2015b) as the basis of all the simulations, introducing variations to the core model as described in  
660 the following. For simplicity, we generally simulated two sets of trials for each hypothetical neuron:  
661 one with a relatively strong positive drift rate, and the other most often with zero drift. While this  
662 represented fewer conditions than in the real neural data, it was sufficient to explore the potential  
663 brittleness of model selection to underdispersion, non-monotonicity, and parameter variation within a  
664 dataset. We also performed some simulations using four different drift rates.

665 Except where indicated, the default variance of the DDM ( $\omega^2$ ) was  $10^{-2}$ . This value was typical of  
666 the DDM model parameters fit to our LIP data, as well as those reported by Latimer et al. (2015b).  
667 Based on the analysis of the LIP data, we assumed a decision-formation period of 500 ms. When  
668 binned using 10 ms bins we obtained a total of 50 time points.

## 669 Underdispersed responses

670 We simulated underdispersed DDM responses by first generating time-varying firing rates according  
671 to the unchanged DDM (Equations 5–7). Then, rather than generating spike counts from the Poisson  
672 distribution assumed during model selection, we instead applied time rescaling to a gamma-interval

673 renewal process to generate spike counts with smaller variance. Specifically, for each trial, we first  
674 generated a list of event times  $g_0, g_1, g_2, \dots$  with  $g_0 = 0$  and each interval  $g_i - g_{i-1}$  for  $i \geq 1$   
675 drawn independently from a gamma distribution with mean 1 and shape parameter varying from 1  
676 (corresponding to a Poisson process) to 6 in different simulations. We then set  $y_{j,t}$  to the number of  
677 these events that fell between  $\sum_{k=1}^{t-1} r_{j,k} \Delta t$  (exclusive) and  $\sum_{k=1}^t r_{j,k} \Delta t$  (inclusive). The empty sum  
678 in the lower limit when  $t = 1$  was defined to be 0. When the shape parameter is greater than 1,  
679 counts generated in this way will have lower variance than a Poisson process. Indeed, this process  
680 generated Fano factors for 10 ms-binned counts that ranged from about 0.65 (for shape parameter 6)  
681 to 1 (for shape parameter 1, corresponding to Poisson; [Supp. Fig. 4A](#)). The trial-to-trial Fano factors  
682 for DDM simulations with gamma-interval renewal spiking were somewhat larger as they included  
683 variance arising from the latent process.

684 For these simulations we took  $\gamma=45$  spikes/s, and  $x_0=0.2, 0.3, 0.35, 0.4, \text{ or } 0.55$ . Drift rates for  
685 condition 1, ranged from 0.004 to 0.015. For condition 2 drift rate was usually zero and for a small  
686 subset of hypothetical neurons was -0.002 to induce a slow decrease in firing rate.

## 687 **Mixed responses**

688 We used two sets of simulations to mimic the complex firing rate profiles found for the PMd neurons.  
689 In the first, we assumed no diffusion noise. Thus the latents of the hypothetical neurons were of the  
690 form of a simple deterministic ramp for one condition (condition 1) and a flat level for the other  
691 condition (condition 2). Once we obtained latents for each condition, we multiplied them by a  
692 non-monotonic function ([Fig. 4A](#)),  $f(t)$ , that was defined as follows.

$$g(t) = \frac{1}{\Gamma(k)\theta^k} (T-t)^{k-1} \exp\left(\frac{-(T-t)}{\theta}\right) \quad (10)$$

$$f(t) = \frac{g(t)}{sg(T - (k-1)\theta)} - \frac{t}{100} \quad (11)$$

$$x_{j,t} = x_0 + x_{j,t} f(t) \quad (12)$$

693 We assumed  $T=55, k=5, s=1.1, \text{ and } \theta=4$  and that the time variable  $t$  was 50 time points long  
694 starting from  $t=1$ .

695 In the second set of simulated non-monotonic neurons, we assumed both drift and diffusion (again  
696 with  $\omega^2 = 10^{-2}$ ). Once we had simulated initial latents from the DDM, we then again used the  
697 function defined in Eqn. 11 above to create a non-monotonic firing rate profile. These latents were  
698 then converted into spike counts after being mapped into firing rates using equation 9.

699 We also assumed for some simulations of hypothetical neurons, four stimulus levels, instead of just  
700 two stimulus levels.

## 701 **Non-stationary parameters**

702 To explore brittleness in the face of non-stationarity we generated data from a DDM in which diffusion  
703 noise varied with condition. The common parameters  $\gamma=45$  spikes/s and  $x_0 = 0.4$  were shared by all

704 simulations. We varied  $\omega^2$  and  $\beta_c$  for the two choices. We again assumed non-zero drift rates for  
705 trials from condition 1 (range from 0.0035 – 0.0190) and a 0 drift rate for condition 2. Condition 1  
706 trials were simulated with a diffusion variance  $\omega^2 = 10^{-2}$ . The diffusion variance on condition 2 trials  
707 was set either one or two orders of magnitude smaller:  $\omega^2 = 10^{-3}$  or  $10^{-4}$ . Given these parameters,  
708 spike counts were generated using the DDM model (Equations 5–9).

## 709 Hybrid model

710 Finally, we considered hypothetical neurons that ramp under one condition (corresponding to PREF  
711 choices) but step in another. For simulation of PREF-choice firing rates, we assumed the following  
712 parameters for the DDM:  $\gamma = 50$ ,  $x_0 = 0.25$ ,  $\omega^2 = 10^{-2}$ , and  $\beta$  ranging from 0.0045 to 0.0160.  
713 For the NONPREF-choice firing rates, we assumed a step model with negative binomial parameters  
714  $p = 0.92$ ,  $r = 2$ ;  $\phi = 0.9$ ;  $\alpha_0 = \alpha_2 = 12.5$  spikes/s and  $\alpha_1 = 15$  spikes/s or 10 spikes/s.

## 715 Deviance Information Criterion for model selection

716 Latimer et al. (2015b) performed model selection using the deviance information criterion (DIC), which  
717 provides a Bayesian estimate of the divergence error of a model (Gelman et al., 2014; Spiegelhalter  
718 et al., 2002). Despite its Bayesian formulation, DIC is closer in spirit to Akaike’s (1974) Information  
719 Criterion (AIC) than to the Bayesian Information Criterion (BIC; Schwarz, 1978) in that it seeks  
720 to find the closer of the models to the data rather than choosing the one most likely to be correct  
721 (an effort of debatable utility when the answer is almost certainly “neither”). Unlike AIC, DIC  
722 incorporates prior information and provides an estimate that should be useful outside an asymptotic  
723 limit. It is well-suited for use with Markov chain Monte-Carlo fitting methods, which draw samples  
724 from the posterior over the model parameters even when the exact posterior density cannot be  
725 computed. Nonetheless, it is open to criticism (Spiegelhalter et al., 2014). We employed it here to  
726 maintain compatibility with the earlier study, and our central point concerned the interpretation of  
727 model selection methods in general rather than any particular criterion.

The DIC for a model  $\mathcal{M}$  with parameters  $\Theta_{\mathcal{M}}$  is defined as:

$$DIC(\mathcal{M}) = -2 \log \mathbb{P}(\text{Data} | \bar{\Theta}_{\mathcal{M}}, \mathcal{M}) + 2p_D(\mathcal{M}) \quad (13)$$

$$p_D(\mathcal{M}) = 2 \log \mathbb{P}(\text{Data} | \bar{\Theta}_{\mathcal{M}}, \mathcal{M}) - 2E_{\Theta_{\mathcal{M}} | \text{Data}, \mathcal{M}} [\log \mathbb{P}(\text{Data} | \Theta_{\mathcal{M}}, \mathcal{M})], \quad (14)$$

728 where *Data* represents the available observations and  $\bar{\Theta}_{\mathcal{M}}$  denotes the posterior mean of the model  
729 parameters given these data.

730 The first term in Equation 13 is the deviance: twice the negative log-likelihood, usually measured  
731 relative to a baseline model although we have omitted that term here as it does not affect the  
732 outcome of model selection. A lower value indicates a better fit. The quantity  $p_D$  is an estimate  
733 of the discrepancy between the deviance of the mean parameters and the expected posterior of the  
734 “true deviance”. It acts as a form of data-dependent model complexity penalty.

735 Both the mean parameters  $\bar{\Theta}_{\mathcal{M}}$  and the expectation in the second term of  $p_D$  (Equation 14) can be  
736 estimated by taking the corresponding empirical averages over Monte-Carlo samples from the posterior

737 distributions  $\mathbb{P}(\Theta_{\mathcal{M}}|Data, \mathcal{M})$ . Evaluation of the likelihoods also require a numerical estimate of the  
 738 implicit integral over the latent parameters. For the DDM, we used the code from (Latimer et al.,  
 739 2015b) that computed Monte-Carlo estimates with 300 sample trajectories for each trial and each  
 740 parameter value. For the step model, we truncated the possible step times to a maximum of 1500 ms  
 741 and evaluated the likelihood using a grid-based numerical integral.

## 742 DIC score

For model selection, DIC is computed separately for the DDM and step models. Larger DIC values mean that the model is a poorer fit to the data. We compared the models using a relative DIC “score”, which was the difference between the DIC values for the two models:

$$\Delta_{DIC} = DIC(\text{DDM}) - DIC(\text{Step}) \quad (15)$$

743 A DIC score  $> 0$  suggests that the step model describes single-trial firing rates better than the DDM,  
 744 and a DIC score  $< 0$  implies the opposite.

## 745 DIC contributions from PREF and NONPREF

Under some circumstances, it is useful to understand the contribution of different types of trials to the DIC value for a given model. In this study the data were binned spike counts recorded in independent trials. Thus the log probabilities in Equations 13–14 can be written as sums of single-trial probabilities, giving:

$$DIC(\mathcal{M}) = 2 \sum_j \log \mathbb{P}(\mathbf{y}_j | \bar{\Theta}_{\mathcal{M}}, \mathcal{M}) - 4 \sum_j \frac{1}{S} \sum_1^S \log \mathbb{P}(\mathbf{y}_j | \Theta_{\mathcal{M}}^{(s)}, \mathcal{M})$$

where  $\mathbf{y}_j$  represents the binned spike counts on trial  $j$ . Thus, we can define a “single-trial DIC contribution” for the  $j^{\text{th}}$  trial by

$$DIC^j(\mathcal{M}) = 2 \log p(\mathbf{y}_j | \bar{\Theta}_{\mathcal{M}}, \mathcal{M}) - 4 \frac{1}{S} \sum_1^S \log \mathbb{P}(\mathbf{y}_j | \Theta_{\mathcal{M}}^{(s)}, \mathcal{M})$$

Note however that the mean parameter  $\bar{\Theta}_{\mathcal{M}}$  and samples  $\Theta_{\mathcal{M}}^{(s)}$  are still computed using all trials so this is not a DIC value in itself – rather it measures a contribution to the overall value obtained from this trial. Such single trial contributions can be summed over subsets of trials—for example those corresponding to PREF or NONPREF choices—to examine the net contributions from these different trial types; and the difference of these contributions assessed for the two different models provides a useful measure of relative impact of different trial types on ranking. For example

$$\Delta_{DIC}^{\text{PREF}} = \sum_{j \in \text{PREF}} DIC^j(\text{DDM}) - \sum_{j \in \text{PREF}} DIC^j(\text{Step})$$

746 Systematic differences in these contributions across different trial types may suggest a fundamental  
 747 incompatibility in both models.



## 748 Figures

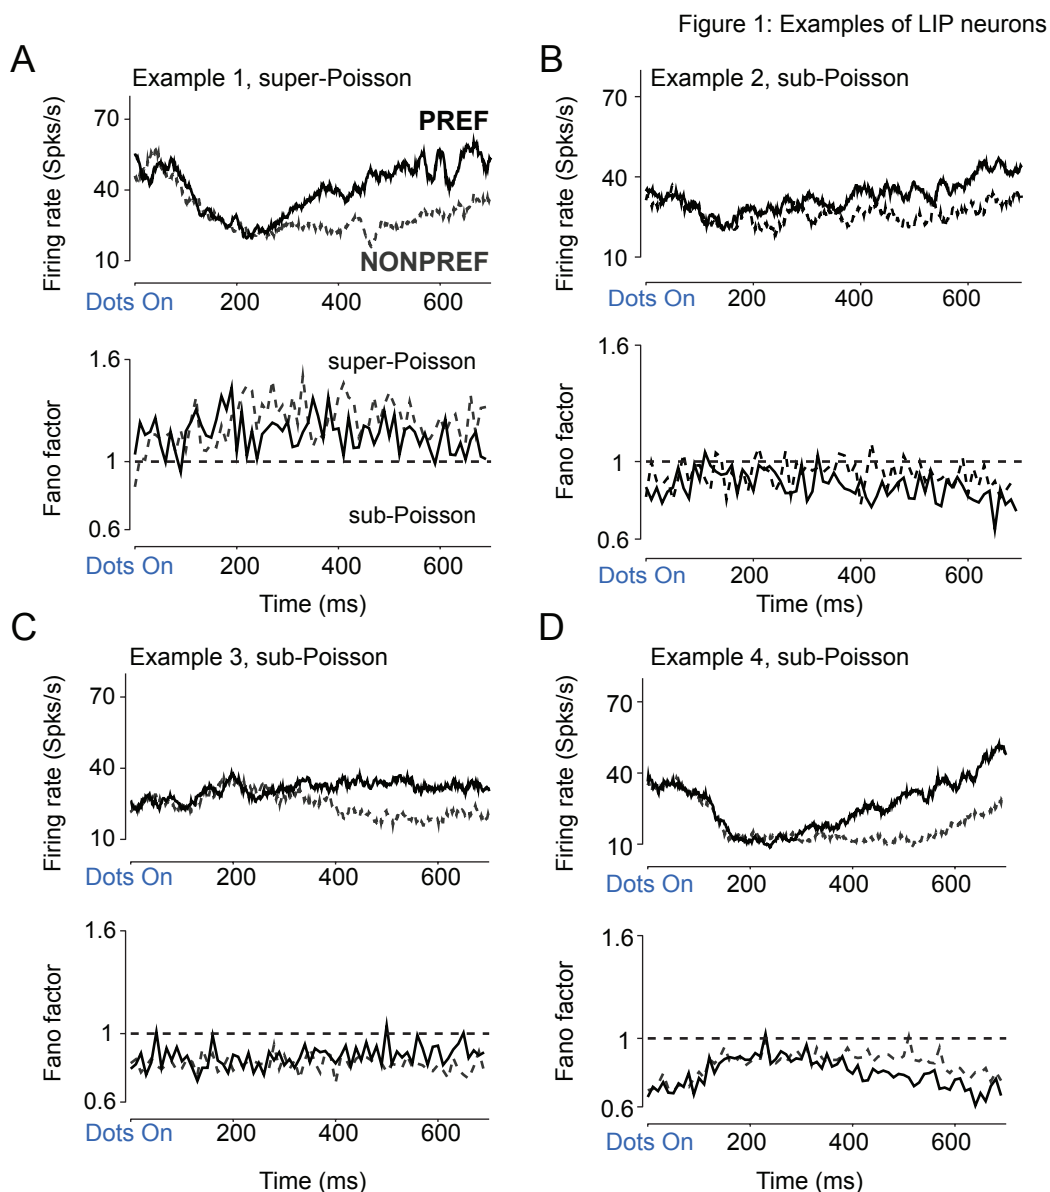

**Figure 1: Single neurons in LIP show choice selectivity and sub-Poisson Fano factors during the decision-formation period.**

749 **A:** Example of a typical decision-related LIP neuron with robust firing rate modulation during the  
750 decision-formation period, and super-Poisson variability.

751 **B, C, D:** Examples of LIP neurons that show modest to robust choice selectivity for the PREF  
752 direction, and sub-Poisson variability. For each neuron, the upper plot shows firing rate in spikes/s and  
753 the lower plot the time-varying Fano factor. Trials are aligned to the onset of the 500 ms-long random  
754 dot stimulus, and separated by whether the saccade was to the PREF (solid lines) or NONPREF  
755 (dashed lines) direction for each neuron. Firing rates are shown for the "LL" reward condition where  
756 each correct choice is rewarded with one drop of juice, and computed by smoothing spike trains with

757 a 50 ms causal box car filter and then averaging over  $\sim 65$  trials. Fano factors for the same groups  
758 of trials were estimated in non-overlapping bins of 10 ms each.

Figure 2 - Subpoisson Firing rates impact results of model comparison

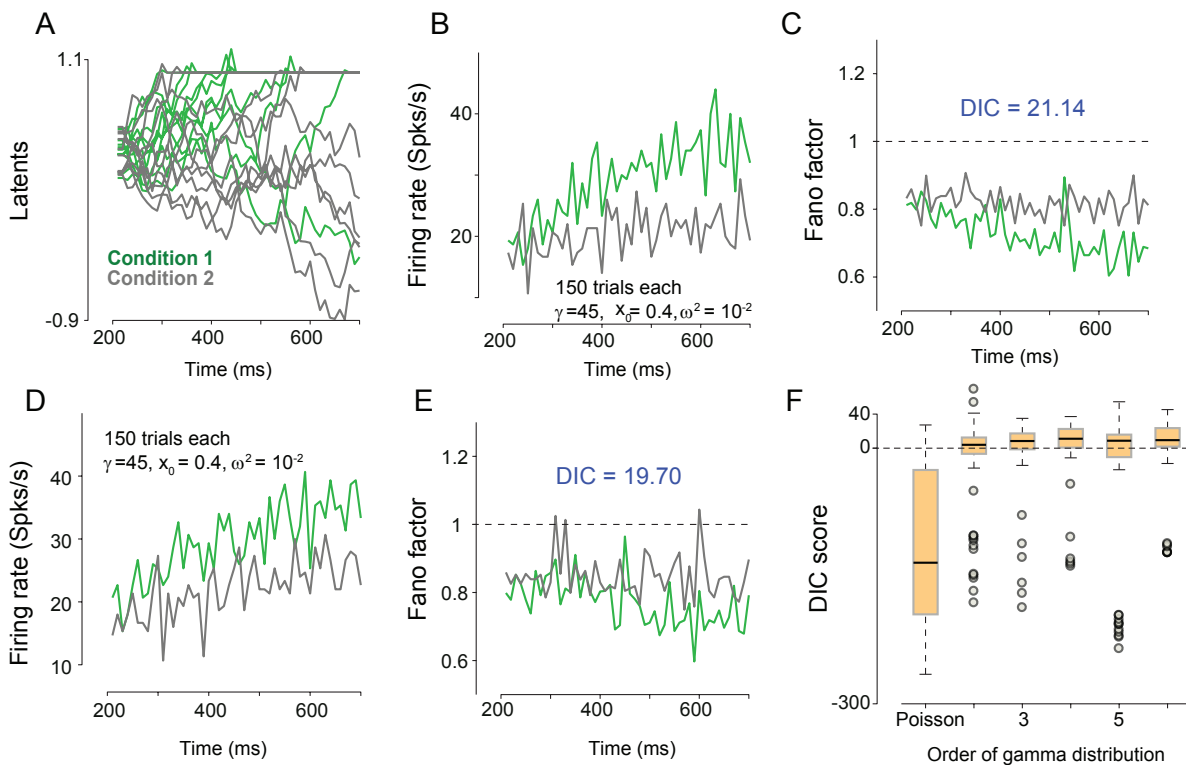

**Figure 2: Simulated neurons with DDM dynamics and sub-Poisson spiking statistics are misleadingly classified as stepping.**

759 **A:** Dynamics of latent variable (including absorbing upper bound) for a simulated neuron from the  
 760 drift diffusion model. 10 trials are shown for each condition: non-zero drift rate (condition 1, green  
 761 lines) and zero drift rate (condition 2, gray lines).

762 **B:** Trial averaged firing rates for the same simulation as in A. Firing rates are averaged over 150  
 763 trials in non-overlapping 10 ms bins. Spike trains were generated using sub-Poisson statistics with a  
 764 gamma order (shape parameter) of 5.

765 **C:** Fano factors for the simulated neuron in A, B. Fano factors were estimated using spike counts  
 766 in non-overlapping 10 ms bins. A value below one shows that overall spiking statistics remain  
 767 sub-Poisson even after diffusion variability across trials is included. The DIC score for this simulated  
 768 neuron favors the step model even though the underlying latent dynamics corresponded to the DDM.

769 **D-E:** Firing rates (D) and Fano factor (E) for another example hypothetical neuron with sub-Poisson  
 770 spiking statistics (generated with a gamma order of 3). and DDM latent dynamics but identified by  
 771 model selection as consistent with the step model.

772 **F:** Box plot of the DIC score as a function of the gamma-interval shape parameter. Higher values of  
 773 this shape parameter induce increased spiking regularity and thus sub-Poisson Fano factors. DIC  
 774 scores for simulated DDM neurons with Poisson statistics (shape parameter 1: no model mismatch)  
 775 were correctly identified as consistent with the DDM. However, even a minor departure to a neuron  
 776 with DDM dynamics and sub-Poisson spiking statistics often led many simulations to be identified as  
 777 consistent with the step model. Gray dots denote outlier DIC scores either in favour of the DDM or

778 the step model.

Figure 3: Examples of PMd neurons

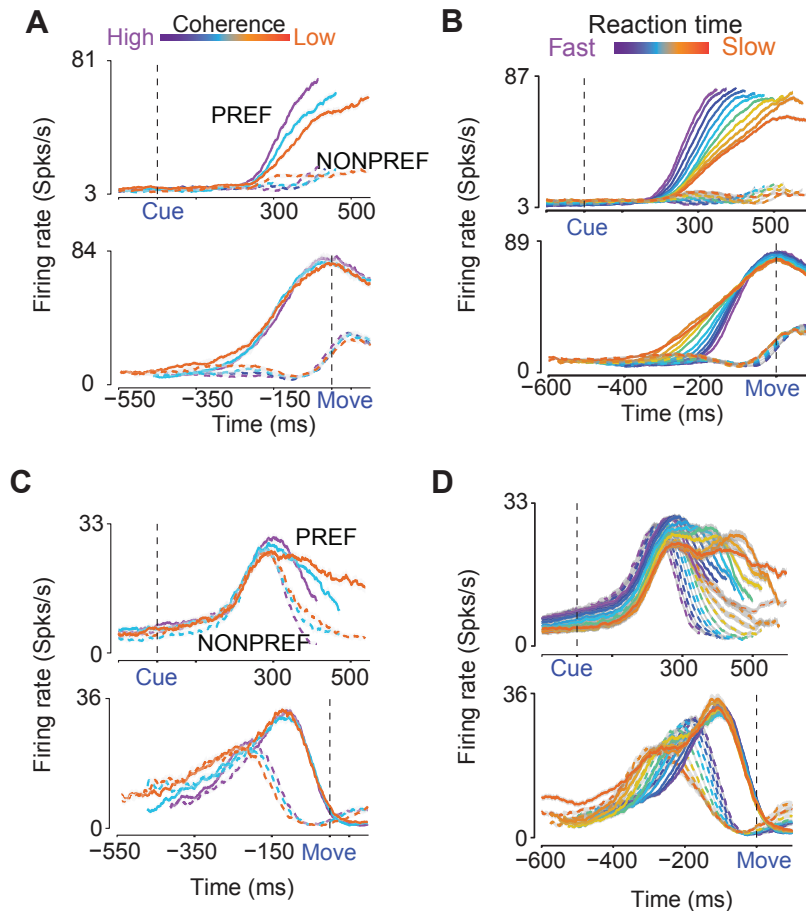

**Figure 3: Example neuronal responses in PMd reflect both canonical decision-related activity and mixed responses.**

779 **A:** Firing rates of an example increased neuron in PMd during the decision task, sorted by coherence  
 780 and arm-movement choice and aligned to checkerboard onset (CUE, top panel) or movement onset  
 781 (MOVE, bottom panel). Colors label coherence conditions from easy (purple) to difficult (orange).  
 782 Solid lines show movements to the PREF-direction; dashed lines show the NONPREF-direction.  
 783 Firing rate traces are obtained using 75 ms causal boxcar filters, and, in the CUE-aligned upper panels,  
 784 truncated at the center point of the reaction-time range for each coherence. Gray shading denotes  
 785 standard error of the mean over trials (SEM); not visible in most traces due to large numbers of  
 786 trials. This neuron shows a clear covariation of firing rate with choice and coherence. Over 1800  
 787 trials were used in total for computing the firing rates for this neuron and for each trace more than  
 788 100 trials were used for computing the average and the standard errors.

789 **B:** Firing rates of the same neuron shown in A grouped by reaction time. Color now represents  
 790 average reaction time, from fast (purple) to slow (orange). Other conventions as in A.

791 **C, D:** Firing rates of another neuron in PMd, showing consistent choice selectivity and covariation  
 792 with coherence (C) and reaction time (D). Conventions for C are the same as A. Conventions for D  
 793 are the same as in B. This neuron also shows non-monotonicity that may arise due to the mixing of  
 794 various signals such as decision-formation and motor preparation associated with a decision-making

795 task.



Figure 4 - Nonmonotonic signals are identified as consistent with steps

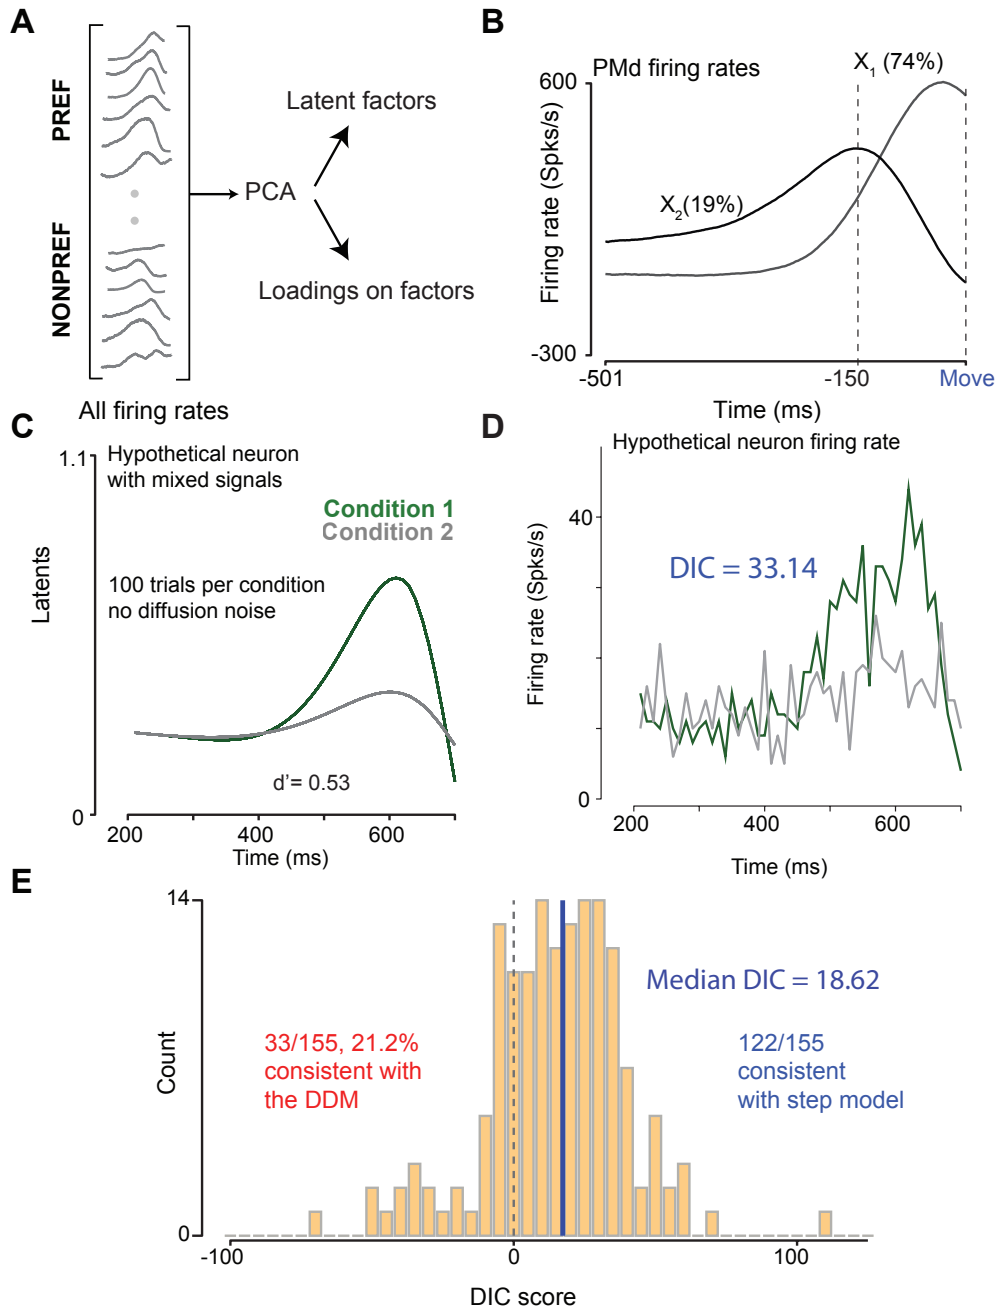

**Figure 4: Hypothetical neurons with mixed non-monotonic firing rates are misleadingly classified as stepping.**

796 **A:** Schematic of the analysis using principal components to describe the components of trial-averaged  
 797 firing rates for the PMd neurons during the decision-making task. PCA provides access to the factors  
 798 (shown in B) and the loadings on the factors.

799 **B:** The first two factors estimated via PCA on the PREF and NONPREF firing rates for PMd neurons.  
 800 PC1 ( $X_1$ ) explains  $\sim 74\%$  of the variance and PC2 ( $X_2$ ) explains  $\sim 19\%$  of the variance.  $X_1$  has a  
 801 monotonic increase in firing rate that is consistent with the DDM and the step models whereas  $X_2$

802 is essentially inconsistent with both models.

803 **C:** Latent dynamics of a hypothetical neuron meant to mimic the non-monotonic firing rate patterns  
804 observed in PMd with components involving both increases and decreases in firing rate resembling  
805 the shape of  $X_2$ . Two conditions are plotted in green and grey, respectively. For this hypothetical  
806 neuron, the latents are identical for every trial and thus plotted on top of one another. Hypothetical  
807 arm movements are assumed to occur at  $t=700$  ms. Data are aligned to the stimulus onset.

808 **D:** Trial-averaged firing rates of the hypothetical neuron shown in C. For each trial spike trains were  
809 generated using a Poisson model output process with latent dynamics given in C. Firing rates were  
810 obtained by averaging over trials for each choice. DIC scores for the neuron shown in C, D supported  
811 the step model. Note that no steps were involved in the simulation but the model selection method  
812 returns DIC scores that identify the neuron as better described by the step model.

813 **E:** Histogram for the combined DIC score for all 155 neurons simulated with complex firing rates.  
814 This distribution also includes neurons simulated with multiple conditions (i.e., multiple drift rates).  
815 The distribution is heavy tailed with neurons that arbitrarily get assigned extreme DIC scores both in  
816 favor of the DDM and the step model. The median DIC score was in favor of the step model even  
817 though no steps were included in the hypothetical neurons.

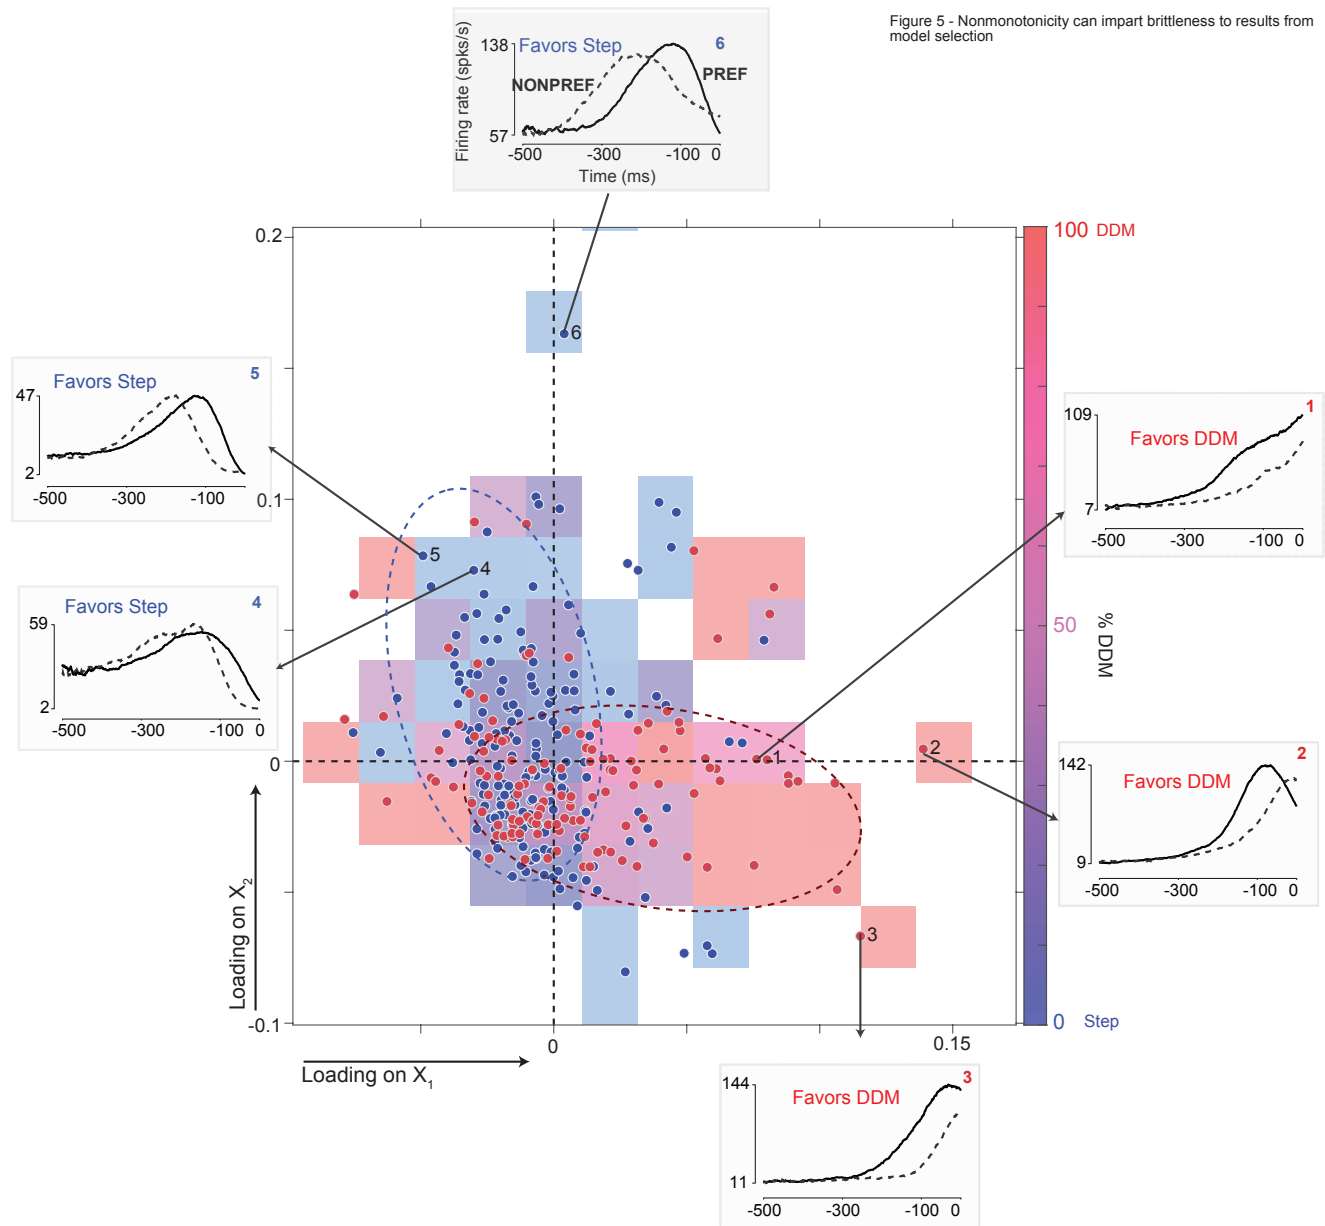

Figure 5 - Nonmonotonicity can impart brittleness to results from model selection

**Figure 5: Non-monotonic firing rates in PMd are often labeled as stepping.**

818 Classification of neurons as ramping or stepping as a function of firing rate loadings on principal  
 819 components 1 ( $X_1$ ) and 2 ( $X_2$ ). Each colored square represents neurons that fall within a single  
 820 bin in the two-dimensional loading space. The hue of the square represents the proportion of these  
 821 neurons classified as ramping from blue (none) to red (all). The saturation varies with the number of  
 822 units in the bin. Empty bins are shown in white. Blue and red dashed ellipses are drawn to indicate  
 823 regions of consistency with the step model and the DDM respectively. Dots represent individual  
 824 neurons colored red or blue depending on whether they are consistent with the DDM or the step  
 825 model. Insets show firing rates of example neurons for PREFER (solid) and NONPREFER (dashed) trials,  
 826 leading up to movement onset at 0 ms.

827 Higher loadings on  $X_1$ , which is broadly consistent with a monotonic increase in firing rate, lead to

828 greater consistency with the DDM (red ellipse and insets 1-3). Higher loadings on the non-monotonic  
829  $X_2$  are associated with more frequent assignments to the step model (blue ellipse and insets 4-6).

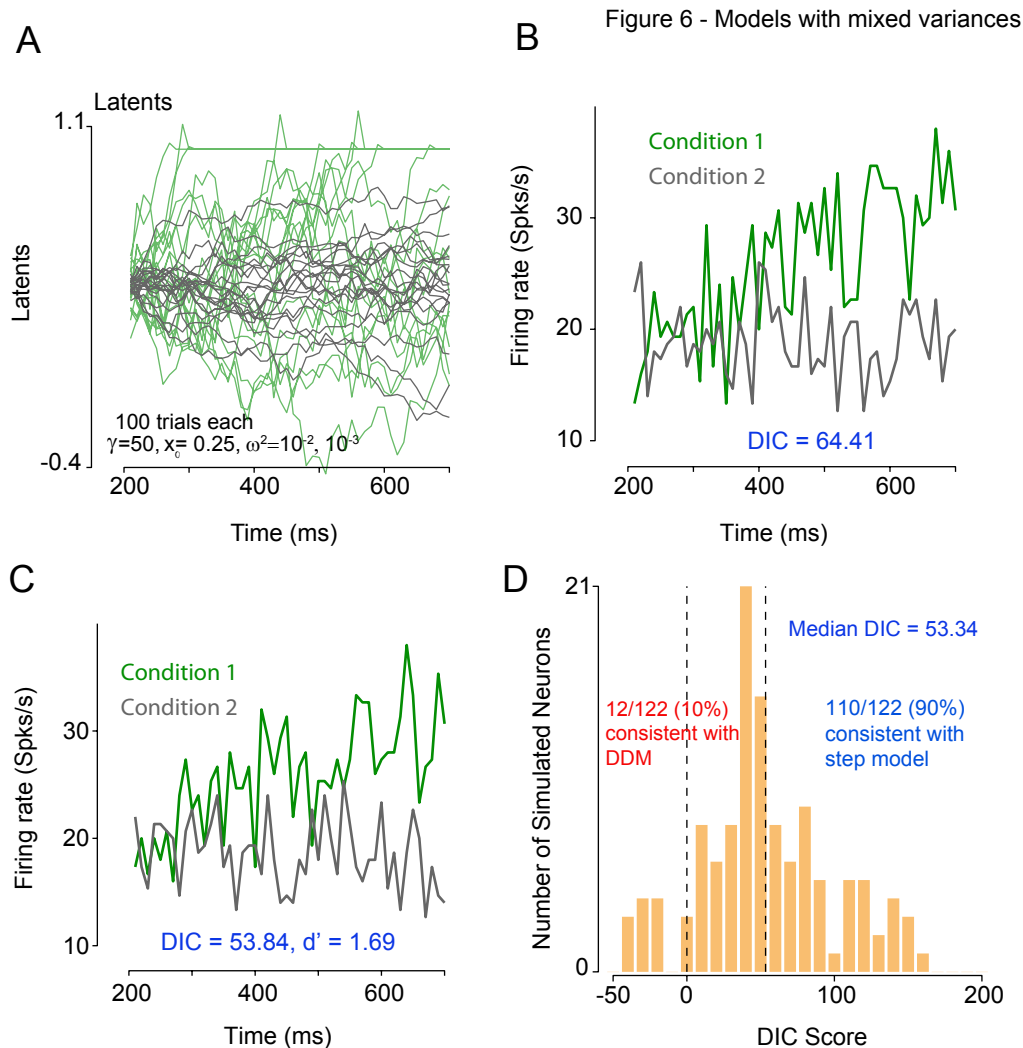

**Figure 6: Hypothetical neurons with non-stationary diffusion noise are classified as stepping.**

830 **A:** Dynamics of latent variable (including absorbing upper bound) for a hypothetical neuron  
 831 with DDM dynamics and condition-dependent diffusion variance. Condition 1 (green traces) had  
 832  $\omega^2 = 10^{-2}$ ; condition 2 (gray traces) had  $\omega^2 = 10^{-3}$ .

833 **B:** Firing rate for the simulated neuron shown in A. DIC score for this hypothetical neuron was  
 834 consistent with the step model even though no steps were introduced.

835 **C:** Firing rates of another example simulated DDM-based neuron with condition-dependent diffusion  
 836 variance as in A and B, classified as stepping.

837 **D:** For the majority of the neurons simulated from the DDM with condition-dependent diffusion  
 838 variance DIC scores favoured the step model. Variance for condition 1 was set at  $10^{-2}$ ; for condition  
 839 2 it was either  $10^{-3}$  or  $10^{-4}$ .

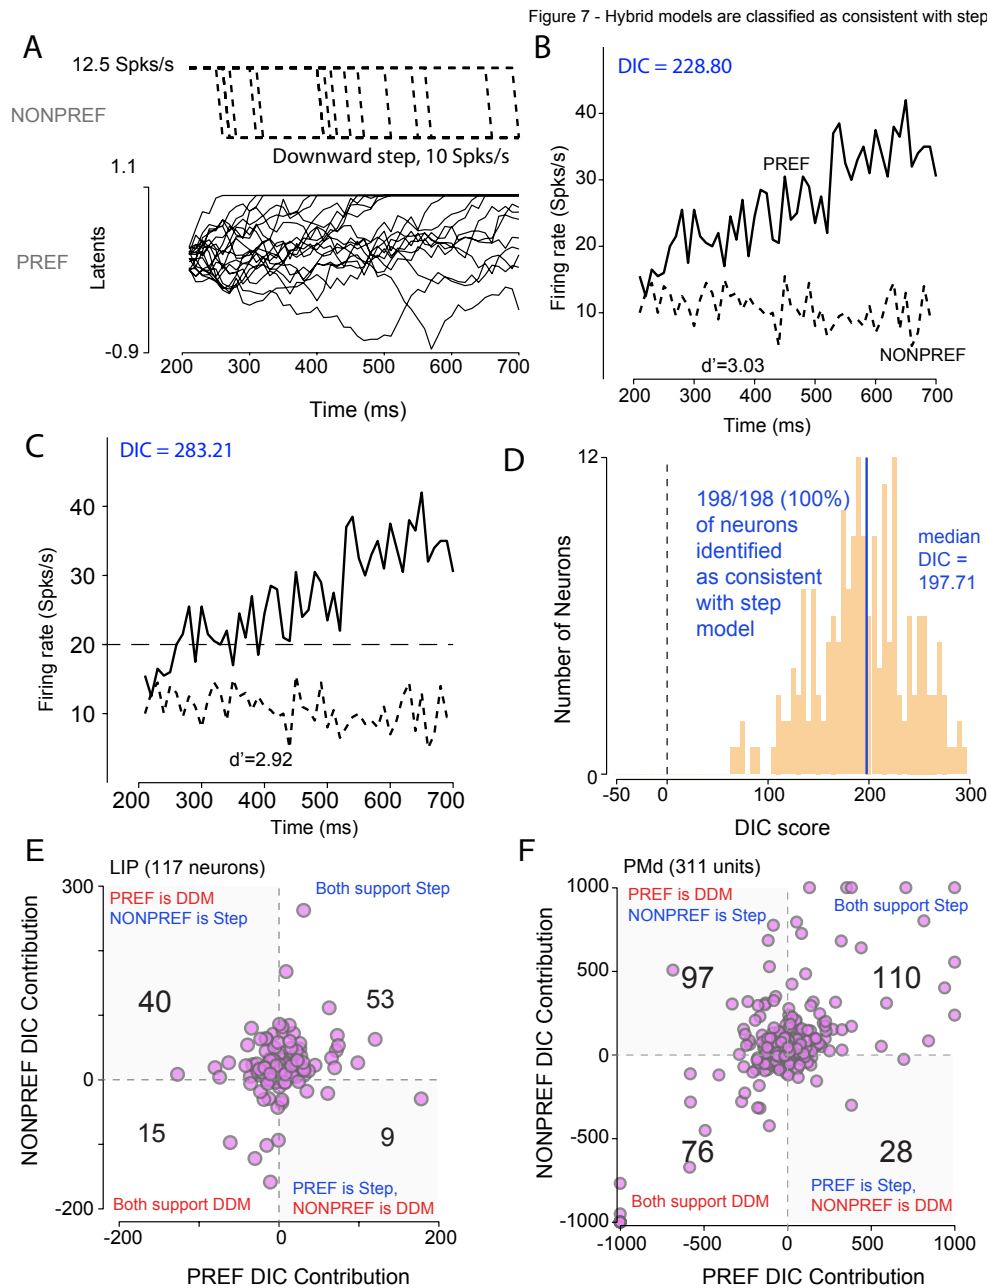

**Figure 7: Hypothetical neurons with different models for different choices are identified as stepping.**

840 **A:** Latent dynamics of a hypothetical neuron with PREF direction latents described by a DDM and  
 841 NONPREF direction latents described by the step model.

842 **B:** Trial-averaged firing rates of the hypothetical neuron shown in A. PREF choice trials are shown  
 843 in solid lines and NONPREF choice trial are shown in dashed lines. For each trial spike trains were  
 844 generated using a Poisson model output process with latent dynamics given in A for the two different  
 845 choices. Firing rates were obtained by averaging over trials for each choice. DIC scores for the neuron  
 846 supported the step model.



847 **C** Firing rates of another hypothetical neuron with DDM latent dynamics for PREF choices and  
848 step for NONPREF choices but identified by model selection as consistent with the step model.  
849 Conventions as in B.

850 **D**: Histogram for the combined DIC score for all 198 neurons simulated with DDM for the PREF  
851 direction and the step model for the NONPREF direction. The median DIC score overwhelmingly  
852 favored the step model even though the units had large PREF direction decision-related responses  
853 that involved ramping.

854 **E**: Plot of contributions to the DIC score from PREF trials and NONPREF trials for each pseudo-  
855 independent neuron in the LIP dataset. For 49/117 neurons, the DIC scores from the PREF and  
856 NONPREF trials did not agree. The number of neurons consistent with each combination of PREF  
857 and NONPREF DIC contribution is provided as text in each quadrant.

858 **F**: Same as E except for PMd data. 125/311 units had DIC score contributions that were different  
859 between PREF and NONPREF trials. Again, many PMd units have DIC score contributions more  
860 consistent with the DDM for PREF compared to NONPREF conditions. DIC score contributions  
861 outside  $\pm 1000$  are clamped at  $\pm 1000$  to highlight structure for other units.

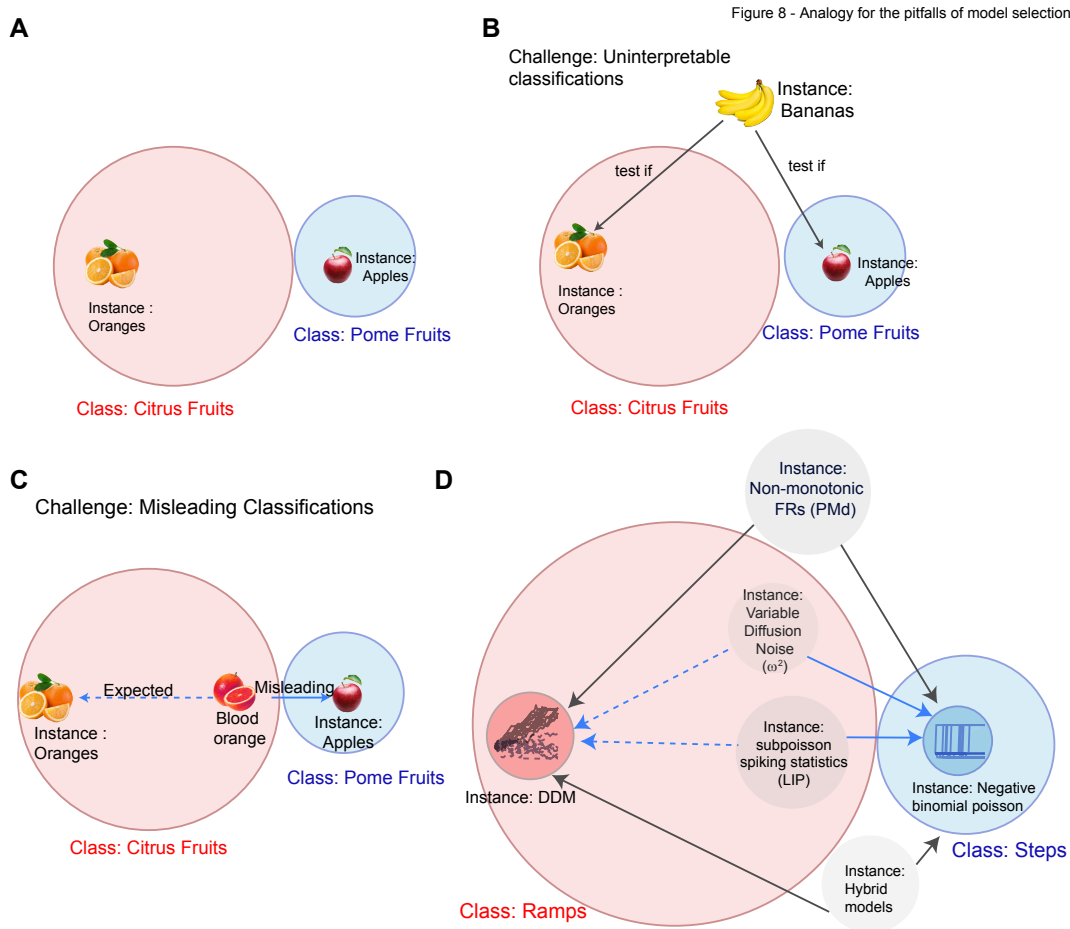

**Figure 8: A fruit analogy summarizing the challenges in model selection.**

862 **A:** A cartoon summary of the use of model selection applied to complex natural systems. Conceptual  
 863 model classes must be exemplified by a mathematical model. In the analogy, the model classes  
 864 of citrus and pome fruits are represented by oranges and apples respectively – each only a single  
 865 instance of the wide range spanned by the corresponding family.

866 **B:** Model selection applied to data (here a banana) that lie outside both model classes can produce  
 867 uninterpretable results. Answers to the question “Is a banana more like an apple or an orange” are  
 868 unlikely to be helpful.

869 **C:** Misleading results can arise when legitimate members of one model class (here a blood orange)  
 870 happen to appear closer to the exemplar of the other one (the apple). Such brittleness depends  
 871 partly on the metric chosen (here, one that weights similarity of color over form) and partly on the  
 872 narrowness of defined exemplars (here, an orange class that allows little variation in color). However,  
 873 these issues are systemic to model selection.

874 **D:** Our simulations examined the results of model selection assigning neural firing dynamics to the  
 875 conceptual classes of “ramps” and “steps”, using the exemplars of a particular drift-diffusion model  
 876 and negative-binomial step-time model respectively. Simulated neurons with mixed responses imposed  
 877 over an otherwise DDM-consistent generative process were consistently assigned to the step model.  
 878 A similar outcome emerged for neurons generated from a hybrid model with steps for one set of trials

879 and the DDM for another set of trials. Other simulations derived from the DDM were more clearly  
880 within the “ramps” class: modifying only the form of spiking noise, or allowing condition-dependent  
881 diffusion variance. These were misleadingly assigned to the “steps” class.

882 **Supplementary Figures**

Supp. Figure 1 - Task Details

**A** Oculomotor discrimination task for LIP neurons

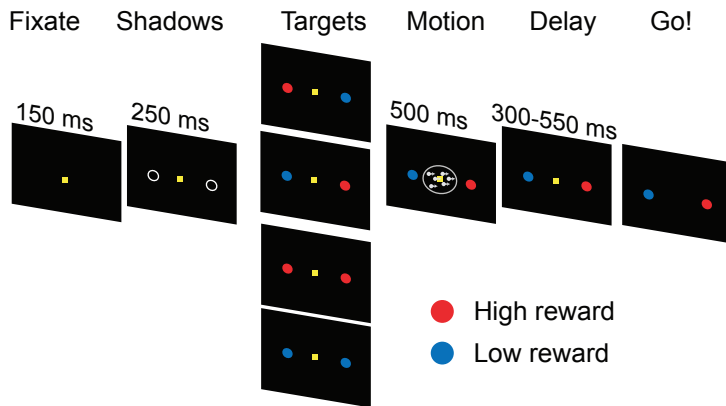

**B**

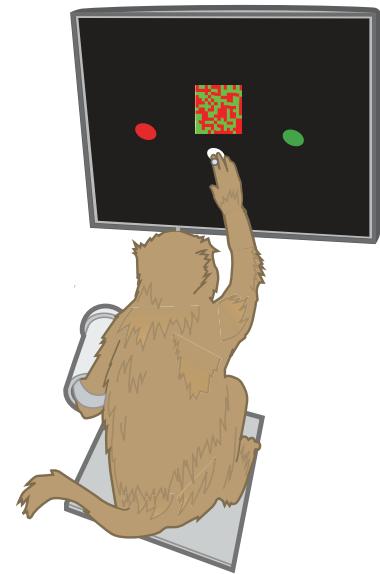

**C** Somatomotor discrimination task for PMd neurons.

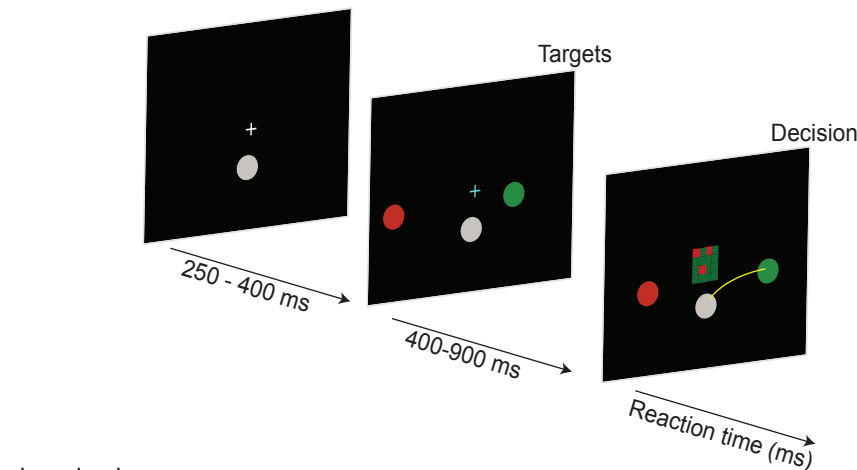

$$\text{signed color coherence (SC)} = \frac{(R-G)}{(R+G)} \times 100$$

**D**

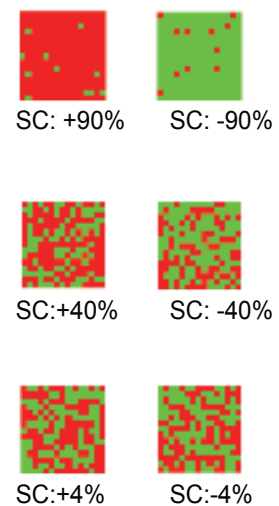

**Supplementary Figure 1: Tasks performed by monkeys for recording of LIP neurons and PMd neurons.**

883 **A:** Sequence of events comprising a typical trial in the oculomotor fixed-duration discrimination task  
 884 used in Rorie et al. (2010). Figure adapted from Figure 1 of Rorie et al. (2010). From left to right,  
 885 trials begin with the onset of a fixation point. Shortly after the monkey fixates its gaze on the fixation  
 886 point, two saccade targets appear and then change color indicating the magnitude of the reward  
 887 available for correctly choosing that target. A blue color target indicates a low magnitude (L) reward,  
 888 while a red color target indicates a high magnitude (H) reward. The four reward conditions are  
 889 depicted vertically—HL, LH, HH, LL, from top to bottom. The visual motion stimulus is centered on

890 the fixation point. Following offset of the motion stimulus, the animals wait for a short randomized  
891 delay period (300 – 550 ms), and then the fixation point extinguishes and the animal is free to make  
892 its choice. A successful trial is rewarded with a drop of juice.

893 **B:** An illustration of the setup for the behavioral task used for recording decision-related activity in  
894 the reaction time visual discrimination task used for PMd. We gently restrained the arm the monkey  
895 was not using with a plastic tube and cloth sling. We tracked a reflective IR bead taped on the  
896 middle digit of the hand to mimic a touch screen and to provide an estimate of instantaneous arm  
897 position. Eye position was tracked using an infra-red reflective mirror placed in front of the monkey's  
898 nose.

899 **C:** Time line of the somatomotor reaction time discrimination task used for recording of PMd data in  
900 Chandrasekaran et al. (2017). From left to right, trials begin with the onset of a central hold target  
901 and a fixation cross. Shortly after the monkey places his hand on the central hold and fixates on the  
902 cross, two reach targets appear on either side of the central target. The targets are red and green  
903 in color. On some trials the left target is red and the right target is green and vice versa. After a  
904 brief holding period, a central static checkerboard composed of red and green squares appears. The  
905 task is a reaction time task and thus the monkey is free to initiate a reach whenever he feels he has  
906 sufficient evidence to report his decision.

907 **D:** Examples of different stimulus ambiguities used in the experiment parameterized by the color  
908 coherence of the Checkerboard cue defined as  $SC=100 \times (R-G)/(R+G)$ . Positive values of signed  
909 color coherence denote more red than green squares and vice-versa.

Supp. Fig 2-Average FR of PMd neurons aligned to checkerboard

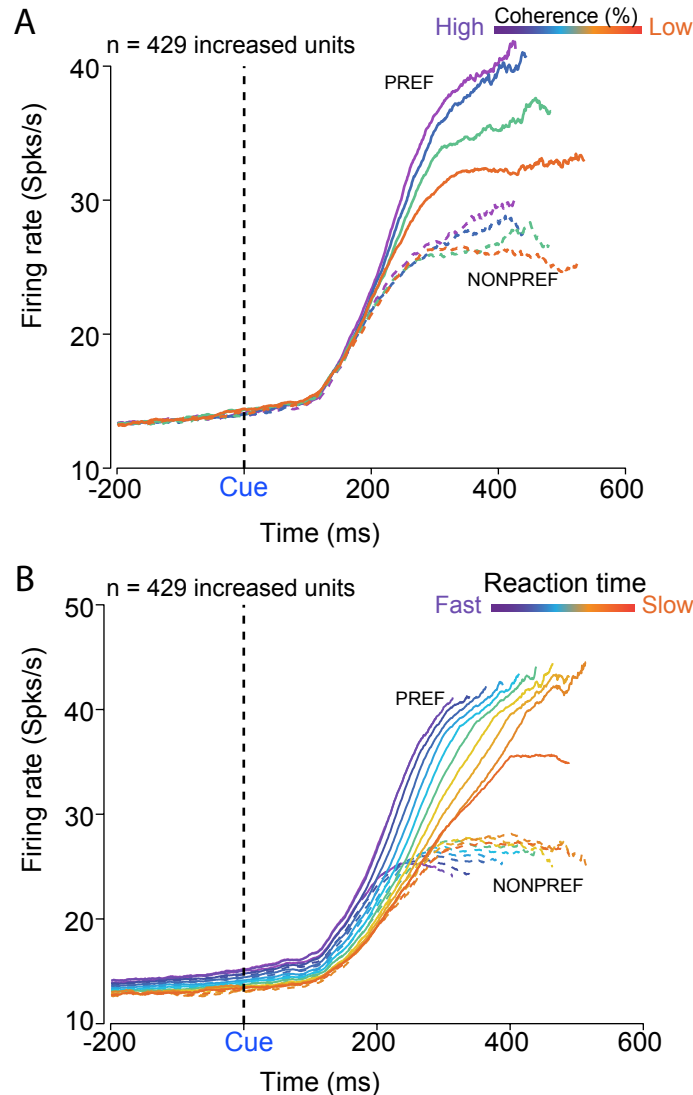

**Supplementary Figure 2: Average firing rate of increased PMd units aligned to checkerboard onset, organized by reaches into the PREF or NONPREF direction, and sorted by either coherence or reaction time.**

910 **A:** Average firing rate across all 429 increased units considered in this study sorted by the coherence  
911 of the checkerboard and the choice made by the animal. Colors label coherence conditions from easy  
912 (purple) to difficult (orange). Solid lines show movements to the PREF-direction; dashed lines show  
913 the NONPREF-direction. firing rate traces are obtained using 50 ms causal boxcar filters, and, in  
914 the CUE-aligned upper panels, truncated at the center point of the reaction-time range for each  
915 coherence.

916 **B:** Average firing rate across all 429 increased units considered in this study sorted by the reaction  
917 time of the animals and the choice made by the animals. Solid lines depict reaches for the PREF  
918 direction; dashed lines depict the NONPREF direction. Colors denote different reaction time bins.

Supp. Fig .3 - Fano factor of hypothetical neurons

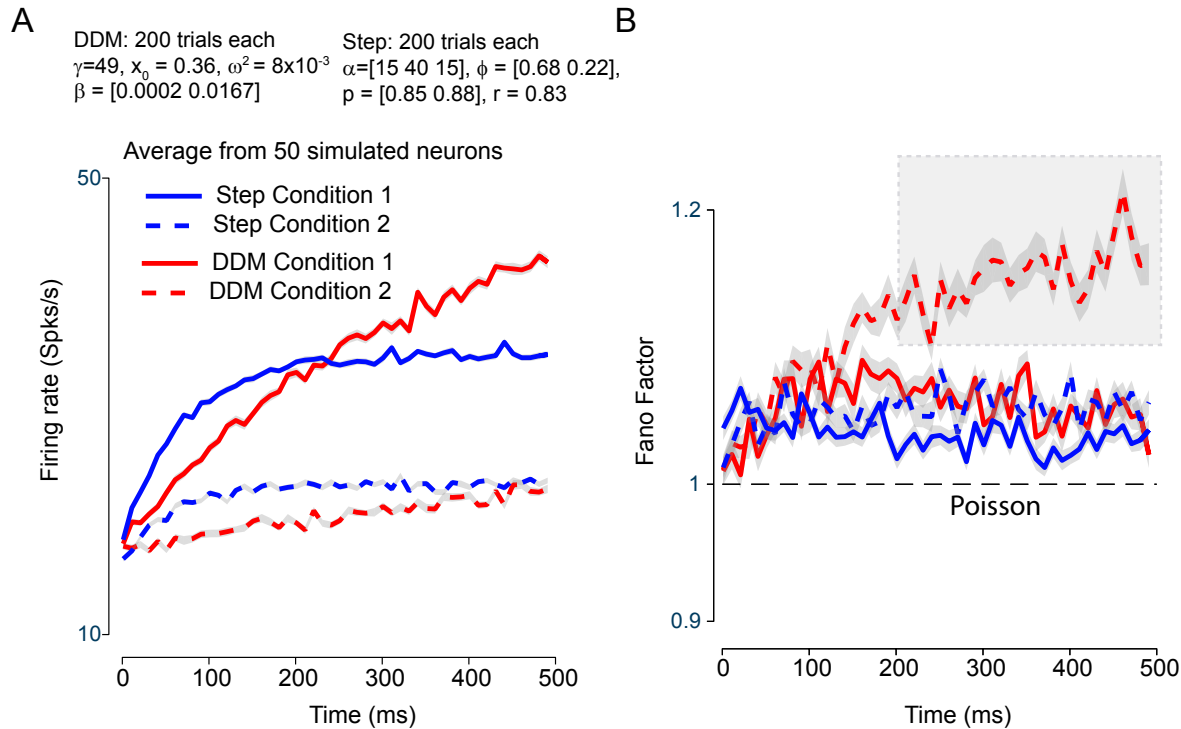

**Supplementary Figure 3: Both step model and DDM assume that Fano factor is super-Poisson (or overdispersed)**

919 **A:** Average firing rate for a condition with strong drift rates or large firing rate step (solid lines) or  
 920 modest drift rates or steps (dashed lines) directions of 50 hypothetical neurons simulated either from  
 921 the DDM (red line) or the step model (blue line) variant described in Latimer et al. (2015b). The  
 922 magnitudes of the various parameters for the DDM and the step model were chosen so that rates of  
 923 the hypothetical step neurons and hypothetical DDM neurons roughly matched.

924 **B:** Average Fano Factor for the same neurons shown in A. Figure conventions as in A. Fano Factor  
 925 for both the step model and the DDM are super-Poisson. We also note that Fano factor for modest  
 926 firing rates, which usually emerges from small drift rates, steadily increases with time for neurons  
 927 simulated from the DDM as defined by Latimer et al. (2015b). The shaded grey rectangle is to draw  
 928 the reader to the rapid increase in Fano factor for modest drift rates when simulated from the DDM.



Supp. Fig. 4 - using subpoisson statistics for simulation with four coherences

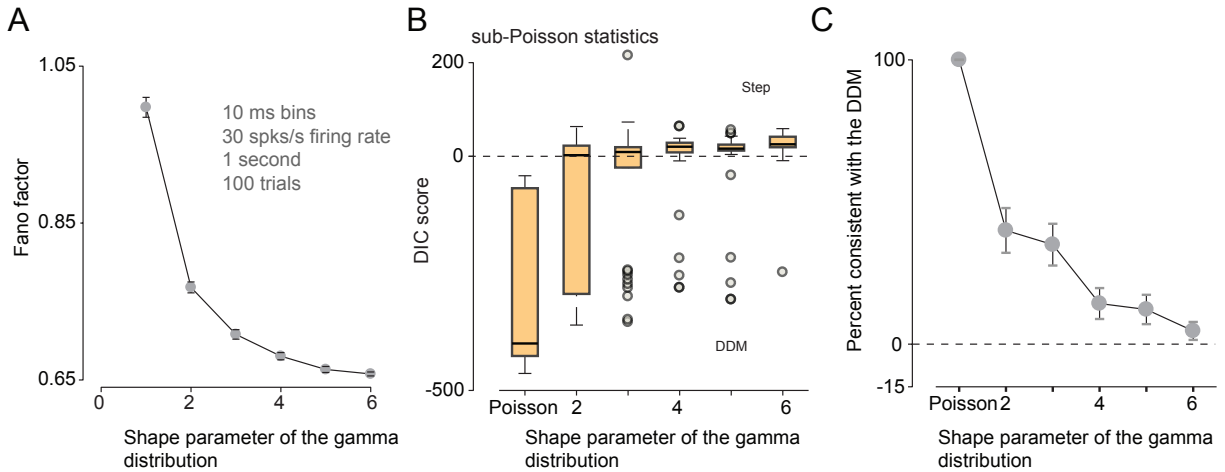

### Supplementary Figure 4: Sub-Poisson firing rates impact results of model selection even with multiple coherences.

929 **A:** Shows the simulated Fano factor for the gamma-interval renewal process. Data are averages over  
930 100 trials simulated at 30 Hz for 1 second each, binned in 10 ms bins. As the shape parameter for  
931 the gamma distribution increases, the Fano factor decreases from 1.

932 **B:** Box plot of DIC score distribution for DDM simulations with 4 different drift rates and with  
933 gamma-interval renewal process spiking, as a function of the shape parameter of the gamma-interval  
934 distribution. Higher values of shape parameter lead to increasing spiking regularity and thus sub-  
935 Poisson Fano factors. DIC scores for simulated neurons with DDM dynamics were increasingly  
936 identified as consistent with the step model when the firing rates became more sub-Poisson. Large  
937 outlier DIC scores (grey dots) sometimes support the DDM for these neurons, but the DIC scores  
938 for a majority of these underdispersed neurons are consistent with the step model. Each box plot is  
939 estimated from the DIC scores of 45 neurons. Only neurons with robust firing rate modulation were  
940 considered for this plot and panel B.

941 **C:** Fraction of neurons consistent with the DDM decreases as the shape parameter of the gamma-  
942 interval renewal process increases. A neuron was considered consistent with the DDM if DIC was  
943 less than 0 for the purposes of this study. Note that neurons quickly become inconsistent with the  
944 DDM even with minor levels of underdispersion.

Supp. Fig. 5 - Additional Examples of PMd neurons

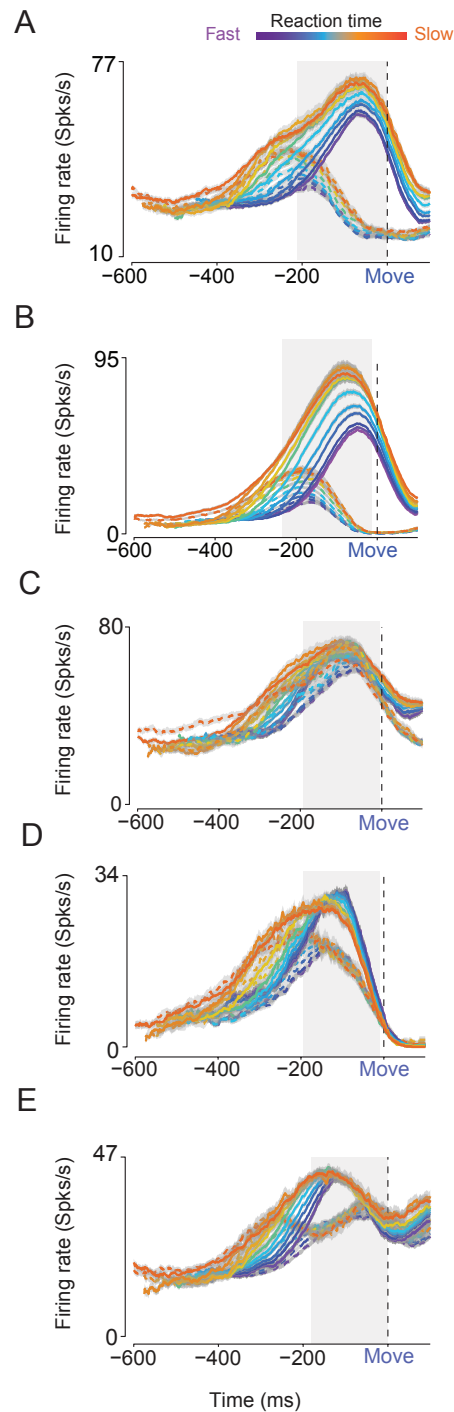

**Supplementary Figure 5: Additional examples of PMd units that show non monotonicity in their firing rates as a function of time.**

945 **A-E:** PEF and NONPEF firing rates for five other PMd units aligned to movement onset. Solid  
946 lines show PEF firing rates, dashed lines show NONPEF choice firing rates. Colors from purple to  
947 orange show different reaction time bins. Dashed black line denotes movement onset. Gray shading

948 is provided to orient the eye to the non-monotonicity in the firing rates.

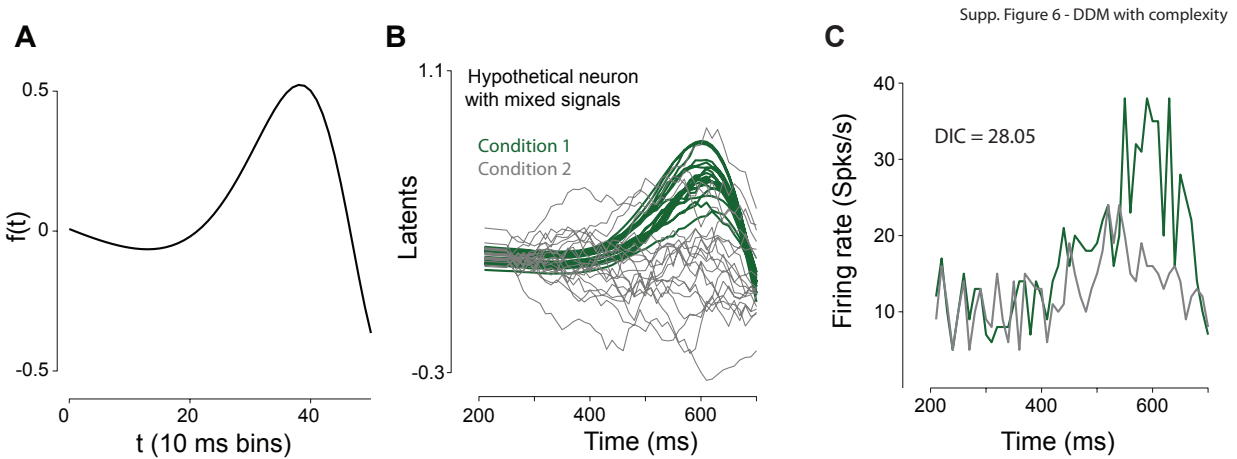

**Supplementary Figure 6: Another example of a hypothetical PMd neuron with non-monotonic firing rate profile being identified as consistent with the step model.**

949 **A:** A plot of  $f(t)$ , the non-monotonic function (see Eqn. 11) used for simulation of hypothetical  
950 neurons that mimic the responses of PMd neurons.  $f(t)$  is typically multiplied by  $x_j(t)$  to give rise to  
951 nonmonotonic latent profiles that are in turn converted into firing rates.

952 **B:** Latent dynamics of another example of a hypothetical neuron meant to mimic the firing rate  
953 patterns observed in PMd. The existence of many more traces in A compared to Fig. 4C are due to  
954 the latents initially being generated from a DDM and then multiplied by a non-monotonic profile.  
955 Green traces reflect one condition and gray traces reflect another condition.

956 **C:** Trial-averaged firing rates of the hypothetical neuron shown in A. For each trial spike trains were  
957 generated using a Poisson model output process with latent dynamics given in A. Firing rates were  
958 obtained by averaging over trials for each choice. Note that no steps were involved in the simulation  
959 but the model selection method returns DIC scores that identify the neuron as better described by  
960 the step model.

961 **Author Contributions:** CC collected the PMd data with input from KVS, WTN and DP, wrote  
962 the code, constructed simulations, analyzed all data, and made figures. JSM and MS constructed  
963 simulations and also developed analytical models to guide insight. CC, KVS, and MS wrote initial  
964 drafts of the paper. LIP data were collected in the lab of WTN by Dr. Alan Rorie. All authors  
965 participated in the development of the figures, interpreted results of data analyses, suggested  
966 simulations and analyses, and revised the final drafts of the paper.

967 **Acknowledgments:**

968 The work was supported by the following grants:

- 969     ▪ CC was supported by an NIH/NINDS K99/R00 grant NS092972 and the Howard Hughes  
970     Medical Institute.
- 971     ▪ JSM was supported by the Gatsby Charitable Foundation
- 972     ▪ DP was supported by the Champalimaud Foundation, Portugal and Howard Hughes Medical  
973     Institute
- 974     ▪ BN was supported by the Howard Hughes Medical Institute.
- 975     ▪ KVS was supported by a Defense Advanced Research Projects Agency NeuroFAST award from  
976     BTO #W911NF-14-2-0013 and the Howard Hughes Medical Institute.
- 977     ▪ MS was supported by the Gatsby Charitable Foundation and the Simons Foundation (SCGB  
978     323228, 543039).

979 We thank Tatiana Engel for helpful suggestions and also advice on implementing time-rescaled  
980 renewal processes.

## 981 References

- 982 Aho, K., Derryberry, D., Peterson, T., 2014. Model selection for ecologists: the worldviews of AIC  
983 and BIC. *Ecology* 95, 631–636.
- 984 Akaike, H., 1974. A new look at statistical model identification. *IEEE Transactions on Automatic*  
985 *Control* 19, 716–723.
- 986 Akaike, H., 1998. Information theory and an extension of the maximum likelihood principle, in:  
987 *Selected Papers of Hirotugu Akaike*. Springer, pp. 199–213.
- 988 Anderson, D.R., Burnham, K.P., 2002. Avoiding pitfalls when using information-theoretic methods.  
989 *J. Wildl. Manage.* , 912–918.
- 990 ATLAS Collaboration, 2012. A particle consistent with the Higgs boson observed with the ATLAS  
991 detector at the Large Hadron Collider. *Science* 338, 1576–1582.
- 992 Ben-Yishai, R., Bar-Or, R.L., Sompolinsky, H., 1995. Theory of orientation tuning in visual cortex.  
993 *Proc. Natl. Acad. Sci. U. S. A.* 92, 3844–3848.
- 994 Birkes, D., Dodge, Y., 2011. *Alternative methods of regression*. volume 190. John Wiley & Sons.
- 995 Bollimunta, A., Totten, D., Ditterich, J., 2012. Neural dynamics of choice: Single-trial analysis of  
996 decision-related activity in parietal cortex. *J. Neurosci.* 32, 12684–12701.
- 997 Box, G.E.P., 1976. Science and statistics. *J. Am. Stat. Assoc.* 71, 791–799.
- 998 Burnham, K.P., Anderson, D.R., 2003. *Model Selection and Multimodel Inference: A Practical*  
999 *Information-Theoretic Approach*. Springer Science & Business Media.
- 1000 Burnham, K.P., Anderson, D.R., Huyvaert, K.P., 2011. AIC model selection and multimodel inference  
1001 in behavioral ecology: Some background, observations, and comparisons. *Behav. Ecol. Sociobiol.*  
1002 65, 23–35.
- 1003 Chandrasekaran, C., Peixoto, D., Newsome, W.T., Shenoy, K.V., 2017. Laminar differences in  
1004 decision-related neural activity in dorsal premotor cortex. *Nat. Commun.* 8, 614.
- 1005 Churchland, A.K., Kiani, R., 2016. Three challenges for connecting model to mechanism in decision-  
1006 making. *Curr Opin Behav Sci* 11, 74–80.
- 1007 Ding, L., Gold, J.I., 2012. Neural correlates of perceptual decision making before, during, and after  
1008 decision commitment in monkey frontal eye field. *Cereb. Cortex* 22, 1052–1067.
- 1009 Ditterich, J., 2006. Evidence for time-variant decision making. *Eur. J. Neurosci.* 24, 3628–3641.
- 1010 Durstewitz, D., Koppe, G., Toutounji, H., 2016. Computational models as statistical tools. *Curr*  
1011 *Opin Behav Sci* 11, 93–99.
- 1012 Focardi, S.M., Fabozzi, F.J., Kolm, P.N., 2012. Model selection and its pitfalls, in: *Encyclopedia of*  
1013 *Financial Models*. John Wiley & Sons, Inc.
- 1014 Gelman, A., Carlin, J.B., Stern, H.S., Dunson, D.B., Vehtari, A., Rubin, D.B., 2014. *Bayesian data*  
1015 *analysis*. volume 2. CRC press Boca Raton, FL.
- 1016 Gold, J.I., Shadlen, M.N., 2007. The neural basis of decision making. *Annu. Rev. Neurosci.* 30,  
1017 535–574.
- 1018 Goris, R.L.T., Movshon, J.A., Simoncelli, E.P., 2014. Partitioning neuronal variability. *Nat. Neurosci.*  
1019 17, 858–865.
- 1020 Hanks, T.D., Kopec, C.D., Brunton, B.W., Duan, C.A., Erlich, J.C., Brody, C.D., 2015. Distinct  
1021 relationships of parietal and prefrontal cortices to evidence accumulation. *Nature* 520, 220–223.
- 1022 Hannan, E.J., Quinn, B.G., 1979. The determination of the order of an autoregression. *J. R. Stat.*  
1023 *Soc. Series B Stat. Methodol.* , 190–195.
- 1024 Hawkins, G.E., Forstmann, B.U., Wagenmakers, E.J., Ratcliff, R., Brown, S.D., 2015a. Revisiting the  
1025 evidence for collapsing boundaries and urgency signals in perceptual decision-making. *J. Neurosci.*

- 1026 35, 2476–2484.
- 1027 Hawkins, G.E., Wagenmakers, E.J., Ratcliff, R., Brown, S.D., 2015b. Discriminating evidence  
1028 accumulation from urgency signals in speeded decision making. *J. Neurophysiol.* 114, 40–47.
- 1029 Hubel, D.H., Wiesel, T.N., 1959. Receptive fields of single neurones in the cat's striate cortex. *J.*  
1030 *Physiol.* 148, 574–591.
- 1031 Jun, J.J., Steinmetz, N.A., Siegle, J.H., Denman, D.J., Bauza, M., Barbarits, B., Lee, A.K.,  
1032 Anastassiou, C.A., Andrei, A., Aydin, Ç., Barbic, M., Blanche, T.J., Bonin, V., Couto, J., Dutta,  
1033 B., Gratiy, S.L., Gutnisky, D.A., Häusser, M., Karsh, B., Ledochowitsch, P., Lopez, C.M., Mitelut,  
1034 C., Musa, S., Okun, M., Pachitariu, M., Putzeys, J., Rich, P.D., Rossant, C., Sun, W.L., Svoboda,  
1035 K., Carandini, M., Harris, K.D., Koch, C., O'Keefe, J., Harris, T.D., 2017. Fully integrated silicon  
1036 probes for high-density recording of neural activity. *Nature* 551, 232–236.
- 1037 Kane, J., Singer, M.D., Meltzer, M.D., 1988. Clozapine for the treatment-resistant. *Arch. Gen.*  
1038 *Psychiatry* 45, 789–796.
- 1039 Kass, R.E., Raftery, A.E., 1995. Bayes factors. *Journal of the American Statistical Association* 90,  
1040 773–795. doi:10.1080/01621459.1995.10476572.
- 1041 Kiani, R., Cueva, C.J., Reppas, J.B., Newsome, W.T., 2014. Dynamics of neural population responses  
1042 in prefrontal cortex indicate changes of mind on single trials. *Curr. Biol.* 24, 1542–1547.
- 1043 Latimer, K.W., Huk, A.C., Pillow, J.W., 2015a. Bayesian inference for latent stepping and ramping  
1044 models of spike train data. *Advanced State Space Methods for Neural and Clinical Data*, Cambridge  
1045 University Press.
- 1046 Latimer, K.W., Huk, A.C., Pillow, J.W., 2017. No cause for pause: new analyses of ramping and  
1047 stepping dynamics in LIP (rebuttal to response to reply to comment on Latimer et al. 2015).  
1048 bioRxiv unreviewed preprint , 160994.
- 1049 Latimer, K.W., Yates, J.L., Meister, M.L., Huk, A.C., Pillow, J.W., 2015b. Single-trial spike trains in  
1050 parietal cortex reveal discrete steps during decision-making. *Science* 349, 184–187.
- 1051 Latimer, K.W., Yates, J.L., Meister, M.L., Huk, A.C., Pillow, J.W., 2016. Response to comment on  
1052 “Single-trial spike trains in parietal cortex reveal discrete steps during decision-making”. *Science*  
1053 351, 1406.
- 1054 Lee, J., Ozden, I., Song, Y.K., Nurmikko, A.V., 2015. Transparent intracortical microprobe array  
1055 for simultaneous spatiotemporal optical stimulation and multichannel electrical recording. *Nat.*  
1056 *Methods* 12, 1157–1162.
- 1057 Lien, A.D., Scanziani, M., 2013. Tuned thalamic excitation is amplified by visual cortical circuits.  
1058 *Nat. Neurosci.* 16, 1315.
- 1059 Linderman, S.W., Gershman, S.J., 2017. Using computational theory to constrain statistical models  
1060 of neural data. *Curr. Opin. Neurobiol.* 46, 14–24.
- 1061 Maimon, G., Assad, J.A., 2009. Beyond Poisson: Increased spike-time regularity across primate  
1062 parietal cortex. *Neuron* 62, 426–440.
- 1063 Mante, V., Sussillo, D., Shenoy, K.V., Newsome, W.T., 2013. Context-dependent computation by  
1064 recurrent dynamics in prefrontal cortex. *Nature* 503, 78–84.
- 1065 Marreiros, A.C., Kiebel, S.J., Friston, K.J., 2010a. A dynamic causal model study of neuronal  
1066 population dynamics. *Neuroimage* 51, 91–101.
- 1067 Marreiros, A.C., Stephan, K.E., Friston, K.J., 2010b. Dynamic causal modeling. *Scholarpedia J.* .
- 1068 Mars, R.B., Shea, N.J., Kolling, N., Rushworth, M.F., 2012. Model-based analyses: Promises, pitfalls,  
1069 and example applications to the study of cognitive control. *Q. J. Exp. Psychol.* 65, 252–267.
- 1070 Maynard, E.M., Nordhausen, C.T., Normann, R.A., 1997. The Utah intracortical electrode array: A  
1071 recording structure for potential brain-computer interfaces. *Electroencephalogr. Clin. Neurophysiol.*



- 1072 102, 228–239.
- 1073 Meister, M.L., Hennig, J.A., Huk, A.C., 2013. Signal multiplexing and single-neuron computations in  
1074 lateral intraparietal area during decision-making. *Journal of Neuroscience* 33, 2254–2267.
- 1075 Murtaugh, P.A., 2014. In defense of P values. *Ecology* .
- 1076 Neyman, J., Pearson, E.S., 1966. *Joint Statistical Papers*. University of California Press.
- 1077 Okamoto, H., Isomura, Y., Takada, M., Fukai, T., 2007. Temporal integration by stochastic recurrent  
1078 network dynamics with bimodal neurons. *J. Neurophysiol.* 97, 3859–3867.
- 1079 Packer, A.M., Russell, L.E., Dagleish, H.W.P., Häusser, M., 2014. Simultaneous all-optical manipu-  
1080 lation and recording of neural circuit activity with cellular resolution in vivo. *Nat. Methods* 12,  
1081 140.
- 1082 Pillow, J.W., 2009. Time-rescaling methods for the estimation and assessment of non-Poisson  
1083 neural encoding models, in: Bengio, Y., Schuurmans, D., Lafferty, J.D., Williams, C.K.I., Culotta,  
1084 A. (Eds.), *Advances in Neural Information Processing Systems* 22. Curran Associates, Inc., pp.  
1085 1473–1481.
- 1086 Raftery, A.E., 1995. Rejoinder: Model selection is unavoidable in social research. *Sociol. Methodol.*  
1087 25, 185–195.
- 1088 Raposo, D., Kaufman, M.T., Churchland, A.K., 2014. A category-free neural population supports  
1089 evolving demands during decision-making. *Nat. Neurosci.* 17, 1784–1792.
- 1090 Reinhold, K., Lien, A.D., Scanziani, M., 2015. Distinct recurrent versus afferent dynamics in cortical  
1091 visual processing. *Nat. Neurosci.* 18, 1789–1797.
- 1092 Renn, J., Sauer, T., Stachel, J., 1997. The origin of gravitational lensing: A postscript to Einstein's  
1093 1936 science paper. *Science* 275, 184–186.
- 1094 Rigotti, M., Barak, O., Warden, M.R., Wang, X.J., Daw, N.D., Miller, E.K., Fusi, S., 2013. The  
1095 importance of mixed selectivity in complex cognitive tasks. *Nature* 497, 585–590.
- 1096 Ringach, D.L., Hawken, M.J., Shapley, R., 1997. Dynamics of orientation tuning in macaque primary  
1097 visual cortex. *Nature* 387, 281–284.
- 1098 Roitman, J.D., Shadlen, M.N., 2002. Response of neurons in the lateral intraparietal area during a  
1099 combined visual discrimination reaction time task. *J. Neurosci.* 22, 9475–9489.
- 1100 Rorie, A.E., Gao, J., McClelland, J.L., Newsome, W.T., 2010. Integration of sensory and reward  
1101 information during perceptual decision-making in lateral intraparietal cortex (LIP) of the macaque  
1102 monkey. *PLoS One* 5, e9308.
- 1103 Rossant, C., Goodman, D.F., Fontaine, B., Platkiewicz, J., Magnusson, A., Brette, R., 2011. Fitting  
1104 neuron models to spike trains. *Front. Neurosci.* 5.
- 1105 Schneider, P., 1992. Gravitational lensing statistics, in: *Gravitational Lenses*. Springer, Berlin,  
1106 Heidelberg. *Lecture Notes in Physics*, pp. 196–208.
- 1107 Schwarz, G., 1978. Estimating the dimension of a model. *The Annals of Statistics* 6, 461–464.
- 1108 Shadlen, M.N., Kiani, R., 2013. Decision making as a window on cognition. *Neuron* 80, 791–806.
- 1109 Shadlen, M.N., Newsome, W.T., 1996. Motion perception: seeing and deciding. *Proc. Natl. Acad.*  
1110 *Sci. U. S. A.* 93, 628–633.
- 1111 Shadlen, M.N., Newsome, W.T., 2001. Neural basis of a perceptual decision in the parietal cortex  
1112 (area LIP) of the rhesus monkey. *J. Neurophysiol.* 86, 1916–1936.
- 1113 Spiegelhalter, D.J., Best, N.G., Carlin, B.R., van der Linde, A., 2002. Bayesian measures of model  
1114 complexity and fit. *Journal of the Royal Statistical Society Series B-Statistical Methodology* 64,  
1115 583–616.
- 1116 Spiegelhalter, D.J., Best, N.G., Carlin, B.R., van der Linde, A., 2014. The deviance information  
1117 criterion: 12 years on. *J. R. Stat. Soc. Series B Stat. Methodol.* 76, 485–493.

- 1118 Thura, D., Cisek, P., 2014. Deliberation and commitment in the premotor and primary motor cortex  
1119 during dynamic decision making. *Neuron* 81, 1401–1416.
- 1120 Usher, M., McClelland, J.L., 2001. The time course of perceptual choice: the leaky, competing  
1121 accumulator model. *Psychological review* 108, 550.
- 1122 Watanabe, S., 2010. Asymptotic equivalence of Bayes cross validation and widely applicable  
1123 information criterion in singular learning theory. *J. Mach. Learn. Res.* 11, 3571–3594.
- 1124 Zylberberg, A., Shadlen, M.N., 2016. Cause for pause before leaping to conclusions about stepping.  
1125 bioRxiv unreviewed preprint , 085886.
